# Supplementary material for: Exceptional floods in the Prut basin, Romania, in the context of heavy rains in the summer of 2010
Source: Copernicus journal article supplement (doi:10.5194/nhess-2016-289), 2016-09-12
Supplement: Supplementary file [file nhess-2016-289-AC2-supplement.pdf]

# Exceptional floods in the Prut basin, Romania, in the context of heavy rains in the summer of 2010

Gheorghe Romanescu<sup>1</sup>, Cristian Constantin Stoleriu  
Alexandru Ioan Cuza, University of Iasi, Faculty of Geography and Geology, Department of  
Geography, Bd. Carol I, 20 A, 700505 Iasi, Romania

**Abstract.** The year 2010 was characterized by devastating flooding in Central and Eastern Europe, including Romania, the Czech Republic, Slovakia, and Bosnia-Herzegovina. This study focuses on floods that occurred during the summer of 2010 in the Prut River basin, which has a high percentage of hydrotechnical infrastructure. Strong floods occurred in eastern Romania on the Prut River, which borders the Republic of Moldova and Ukraine, and the Siret River. Atmospheric instability from 21 June-1 July 2010 caused significant amounts of rain, with rates of 51.2 mm/50 min and 42.0 mm/30 min. In the middle Prut basin, there are numerous ponds that help mitigate floods as well as provide water for animals, irrigation, and so forth. The peak discharge of the Prut River during the summer of 2010 was 2,310 m<sup>3</sup>/s at the Radauti Prut gauging station. High discharges were also recorded on downstream tributaries, including the Baseu, Jijia, and Miletin. High discharges downstream occurred because of water from the middle basin and the backwater from the Danube (a historic discharge of 16,300 m<sup>3</sup>/s). The floods that occurred in the Prut basin in the summer of 2010 could not be controlled completely because the discharges far exceeded foreseen values.

## 1 Introduction

Catastrophic floods occurred during the summer of 2010 in Central and Eastern Europe. Strong flooding usually occurs at the end of spring and the beginning of summer. Among the most heavily affected countries were Poland, Romania, the Czech Republic, Austria, Germany, Slovakia, Hungary, Ukraine, Serbia, Slovenia, Croatia, Bosnia and Herzegovina, and Montenegro (Bissolli et al., 2011; Szalinska et al., 2014) (Fig. 1). The strongest floods from 2010 were registered in the Danube basin (see Table 1). For Romania, we underlined the floods from the basins of Prut, Siret, Moldova and Bistrita rivers. ~~Cele mai puternice inundații din anul 2010 s-au înregistrat în bazinul Dunării (Tabel 1). Pentru România sunt subliniate inundațiile din bazinele hidrografice Prut, Siret, Moldova și Bistrița.~~ The most devastating floods in Romania occurred in Moldavia (Prut, Siret) and Transylvania (Tisa, Someș, Tarnave, Olt). The most deaths were recorded in Poland (25), Romania (six on the Buhai River, a tributary of the Jijia), Slovakia (three), Serbia (two), Hungary (two), and the Czech Republic (two) (Romanescu and Stoleriu, 2013a,b).

Floods are one of the most important natural hazards in Europe (Thieken et al., 2016) and on earth as well (Merz et al., 2010; Riegger et al., 2009). They generate major losses in human lives, and also property damage (Wijkman and Timberlake, 1984). ~~Floods are one of the most important natural hazards în Europa (Thieken et al., 2016) dar și pe Terra (Merz et al., 2010; Riegger et al., 2009). Ele se soldează cu cele mai mari pierderi de vieți omenești și cele mai importante pagube materiale (Wijkman and Timberlake, 1984).~~ For this reason, they have been subject to intense research, and significant funds have been allocated to mitigating or stopping them. According to Merz et al. (2010) “the European Flood Directive on the assessment and management of flood risks (European Commission, 2007) requires developing

<sup>1</sup> Corresponding author: romanescugheorghe@gmail.com

47 management plans for areas with significant flood risk (at a river basin scale), focusing on the  
48 reduction of the probability of flooding and on the potential consequences to human health,  
49 the environment and economic activity.” (p. 511).”This shift in flood risk reduction policies  
50 can be observed in the European Flood Directive on the assessment and management of flood  
51 risks (European Commission, 2007). It requires developing management plans for areas with  
52 significant flood risk, focusing on the reduction of the probability of flooding and of the  
53 potential consequences to human health, the environment and economic activity. Flood risk  
54 management plans will be integrated in the long term with the river basin management plans  
55 of the Water Framework Directive, contributing to integrated water management on the scale  
56 of river catchments.” (Merz et al., 2010). Several studies investigated catastrophic floods or  
57 the floods that generated significant damage. They focused on: the statistical distribution of  
58 the maximum annual discharge, using GEV and the links with the basin geology (Ahilan et  
59 al., 2012); climate change impacts on floods (Alfieri et al., 2015; Detrembleurs et al., 2015;  
60 Schneider et al., 2013; Whitfield, 2012); disastrous effects on infrastructures such as  
61 transportation infrastructures, and their interdependence (Berariu et al., 2015); historical  
62 floods (Blöschl et al., 2013; Strupczewski et al., 2014; Vasileski and Radevski, 2014) and  
63 their links to heavy rainfall (Bostan et al., 2009; Diakakis, 2011; Prudhomme and Genevier,  
64 2011; Retsö, 2015); the public perception of flood risks (Brilly and Polic, 2005; Feldman et  
65 al., 2016; Rufat et al., 2015); land use changes and flooding (Cammerer et al., 2012); the  
66 evolution of natural risks (Hufschmidt et al., 2005); geomorphological effects of floods in  
67 riverbeds (Lichter and Klein, 2011; Lóczy and Gyenizse, 2011; Lóczy et al., 2009, 2014; Reza  
68 Ghanbarpour et al., 2014); the spatial distribution of floods (Moel et al., 2009; Parker and  
69 Fordham, 1996); the interrelation between snow and flooding (Revuelto et al., 2013).Some of  
70 the most interesting studies have investigated catastrophic floods or floods that caused  
71 significant damage: statistical distribution of maximum annual discharge using GEV and  
72 relationships with basin geology (Ahilan et al., 2012); climate change impacts on floods  
73 (Alfieri et al., 2015; Detrembleurs et al., 2015; Schneider et al., 2013; Whitfield, 2012);  
74 effects of disasters on infrastructures such as transportation infrastructures and their  
75 interdependence (Berariu et al., 2015); historical floods (Blöschl et al., 2013; Strupezewski et  
76 al., 2014; Vasileski and Radevski, 2014); relații între precipitații torențiale și inundații istorice  
77 (Bostan et al., 2009; Diakakis, 2011; Prudhomme and Genevier, 2011; Retsö, 2015); public  
78 perception of flood risks (Brilly and Polic, 2005; Feldman et al., 2016; Rufat et al., 2015);  
79 schimbări în utilizarea terenurilor și producerea inundațiilor (Cammerer et al., 2012);  
80 evolution of natural risk (Hufschmidt et al., 2005); efecte geomorfologice de albie (Lichter  
81 and Klein, 2011; Lóczy and Gyenizse, 2011; Lóczy et al., 2009, 2014; Reza Ghanbarpour et  
82 al., 2014); distribuția spațială a inundațiilor (Moel et al., 2009; Parker and Fordham, 1996);  
83 interdependența dintre stratul de zăpadă și inundații (Revuelto et al., 2013).  
84

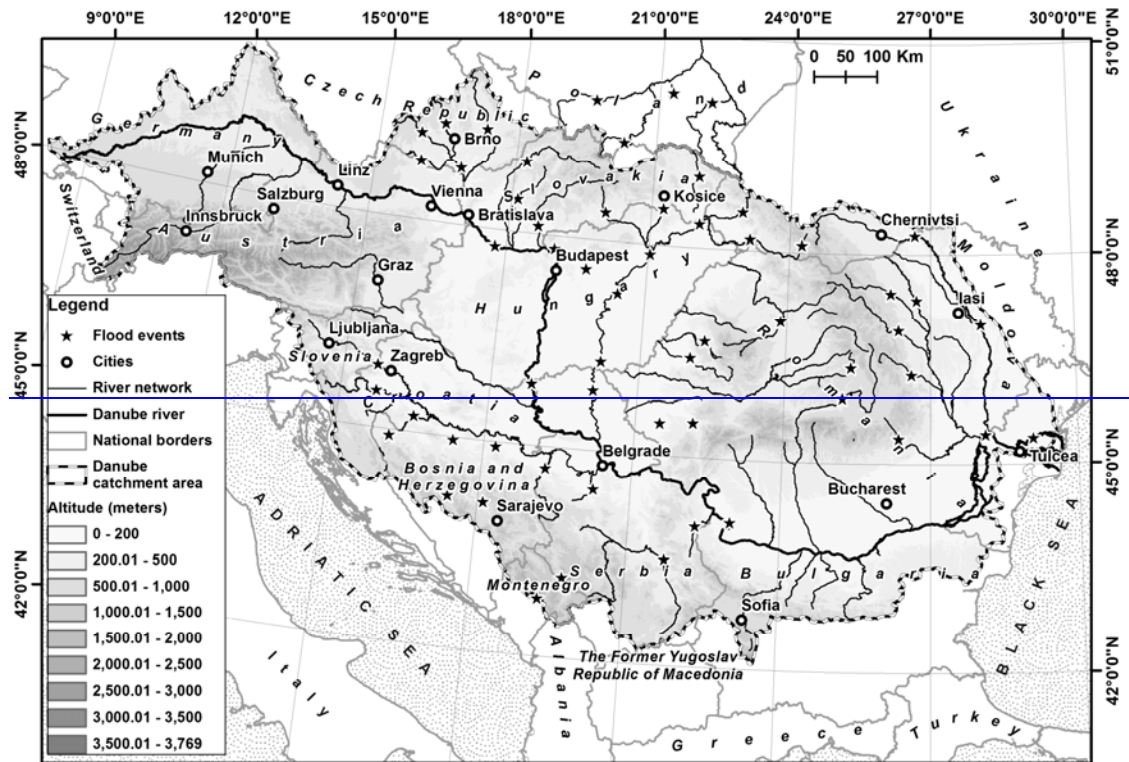

85

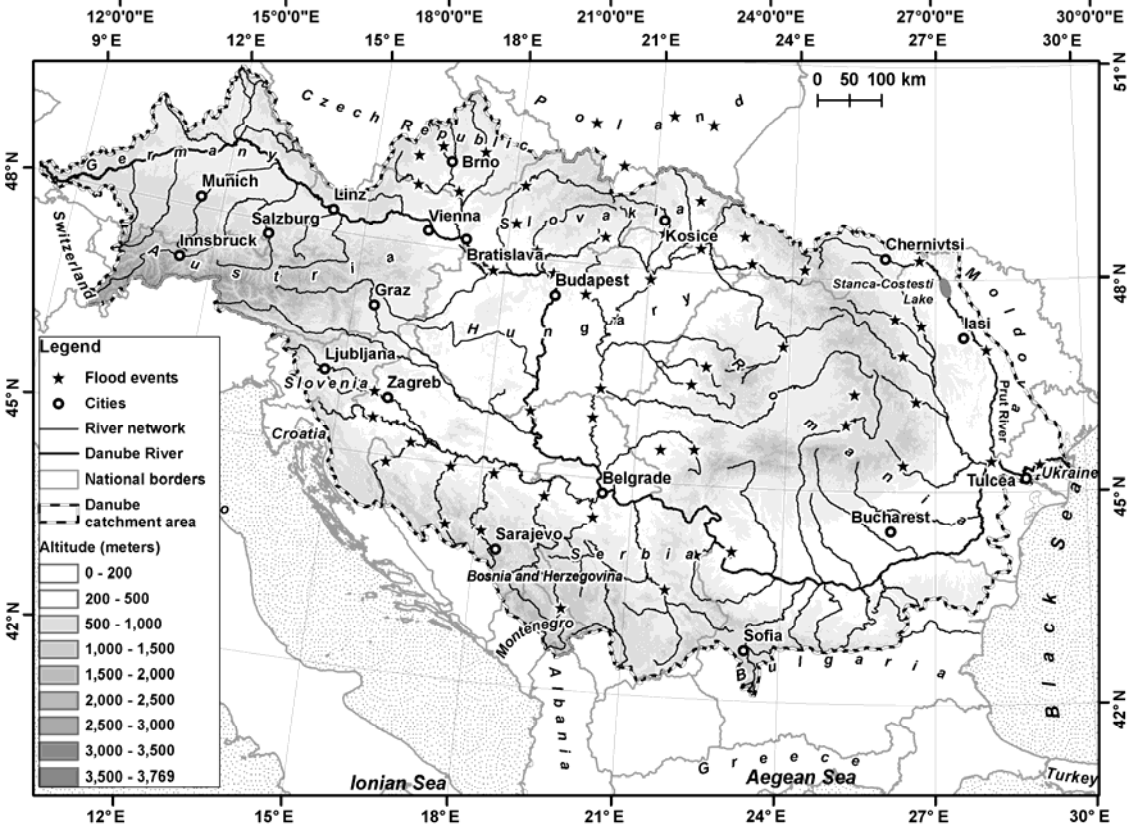

86

87

88

89

**Figure 1.** The Danube catchment and the location of the most important floods that occurred from May-June 2010

90 **Table 1.** Overview of main flood events for the Danube river basin in 2010, as forecasted by  
 91 EFAS and/or reported in international on-line news media (ICPDR, 2010)

| From<br>(dd.mm)          | To<br>(dd.mm)            | River Basin<br>Affected                 | Country<br>Affected     | EFAS Alert<br>Sent?     | Date EFAS<br>Alert<br>Sent | Confirmed? | Comment                                                                                                            |
|--------------------------|--------------------------|-----------------------------------------|-------------------------|-------------------------|----------------------------|------------|--------------------------------------------------------------------------------------------------------------------|
| 20.II<br>February        | 4.<br>March<br>III       | Sava                                    | HR/<br>RS               | Yes<br>(Flood<br>Watch) | 24<br>FebFeb.              | Yes        | Severe flooding in Central & E. Serbia, and in Sava & Morava river systems.                                        |
| 21.II<br>February        | 28.II<br>Februa<br>ry    | Velika<br>Morava                        | RS                      | Yes<br>(Flood<br>Watch) | 16 Feb.                    | Yes        | Severe flooding in eastern Serbia                                                                                  |
| February<br>Febr.        | Februa<br>ryFebr.        | Koeroes                                 | RO/<br>HU               | Yes<br>(Flood<br>Watch) | 16 Feb.                    | No         | (No reports found on on-line news media). Events to be confirmed by partners in next annual EFAS meeting           |
| 1.III<br>March           | 5<br>March<br>III        | Danube                                  | RO/<br>BG               | Yes<br>(Flood<br>Alert) | 3 Mar.                     | Yes        | Severe flooding in S. Romania and in N.W. & N. Bulgaria.                                                           |
| MarchM<br>arch           | March<br>March           | Somes/<br>Mures/<br>Koeroes             | RO/<br>HU               | Yes<br>(Flood<br>Alert) | 18 Mar.                    | No         | No reports found on on-line news media. Events to be confirmed by partners in next annual EFAS meeting             |
| 15.V<br>May              | 30.V<br>May              | Danube/<br>Oder                         | SK/<br>PL/<br>CZ/<br>HU | Yes<br>(Flood<br>Alert) | 12 May.                    | Yes        | Extensive flooding in central & eastern Europe, esp. Poland, Czech Republic, Slovakia, Hungary and Serbia.         |
| Late<br>June             | July                     | Siret/<br>Prut/<br>Moldova/<br>Bistrita | RO/<br>MD               | No                      | -                          | Yes        | Severe flooding in N.E. Romania kill 25 people, also some counties in Moldova.                                     |
| 15<br>July.VII           | 15<br>July.V<br>II       | Prut/Olt                                | RO                      | Yes<br>(Flood<br>Alert) | 7 July.                    | Yes        | Maximum flood alert on Prut river in E. Romania, along border with Moldova.                                        |
| 17.IX<br>Septemb<br>er   | 19.IX<br>Septe<br>mber   | Sava/<br>Soca                           | HR/<br>SL               | Yes<br>(Flood<br>Alert) | 18 Sept.                   | Yes        | Severe flooding in Slovenia kill 3 people. Croatia also affected.                                                  |
| Late<br>Novemb<br>erNov. | Early<br>Decem<br>berDec | Drina                                   | RS                      | Yes<br>(Flood<br>Alert) | 29 Nov.                    | Yes        | Severe flooding in Bosnia, Serbia and Montenegro, with river Drina at highest level in 100 years.                  |
| 3.XII<br>Decembe<br>r    | 8.XII<br>Decem<br>ber    | Sava                                    | HR                      | Yes<br>(Flood<br>Alert) | 5 Dec.                     | Yes        | Heavy rain causes devastating flooding in the Balkans, esp. Bosnia and Herzegovina, Croatia, Montenegro, & Serbia. |
| 9.XII<br>Decembe<br>r    | 9.XII<br>Decem<br>ber    | Tisza                                   | HU/<br>RS               | No                      | -                          | Yes        | Snow-melt and swollen rivers flood 3000 km2 of arable land, esp. near Szeged, on Tisza river, in S.E. Hungary.     |
| Decembe<br>rDec.         | Decem<br>berDec          | Koeroes                                 | HU/<br>RO               | Yes<br>(Flood<br>Alert) | 3 Dec.                     | No         | (No reports found on on-line news media. Event to be confirmed by local authorities in annual EFAS meeting)        |

92  
93  
94  
95  
96  
97  
98  
99  
100  
101  
102  
103  
104  
105  
106  
107  
108  
109  
110  
111  
112

The Prut catchment basin spans three topographic levels: mountains, plateaus, and plains. The surface and underground water supply to the Prut varies by region and is ~~extremely significantly~~ influenced by climatic conditions. This study underscores the role played by local heavy rains in the occurrence of floods, as well as the importance of ponds, mainly the Stanca-Costesti reservoir, in the mitigation of ~~backwater tidal bores~~. We also analyse the local contribution of each catchment basin on the right side of the Prut to the occurrence of the exceptional floods in the summer of 2010. Finally, we consider the upstream discharge and its influence on the lower reaches of the Prut.

## 2 Study area

The Prut River's catchment is situated in the northeastern Danube basin. It is surrounded by several other catchments: the Tisa to the northeast (which spans Ukraine, Romania, and Hungary), the Siret to the west (which is partially in Ukraine), and the Dniestr (in the Republic of Moldova) to the northeast. The Prut catchment occupies eastern Romania and the western part of the Republic of Moldova (Fig. 2). The Prut River begins in the Carpathian Mountains in Ukraine and empties into the Danube near the city of Galati. The catchment measures 27,500 km<sup>2</sup>, of which 10,967 km<sup>2</sup> lies in Romania (occupying approximately 4.6% of the surface of Romania).



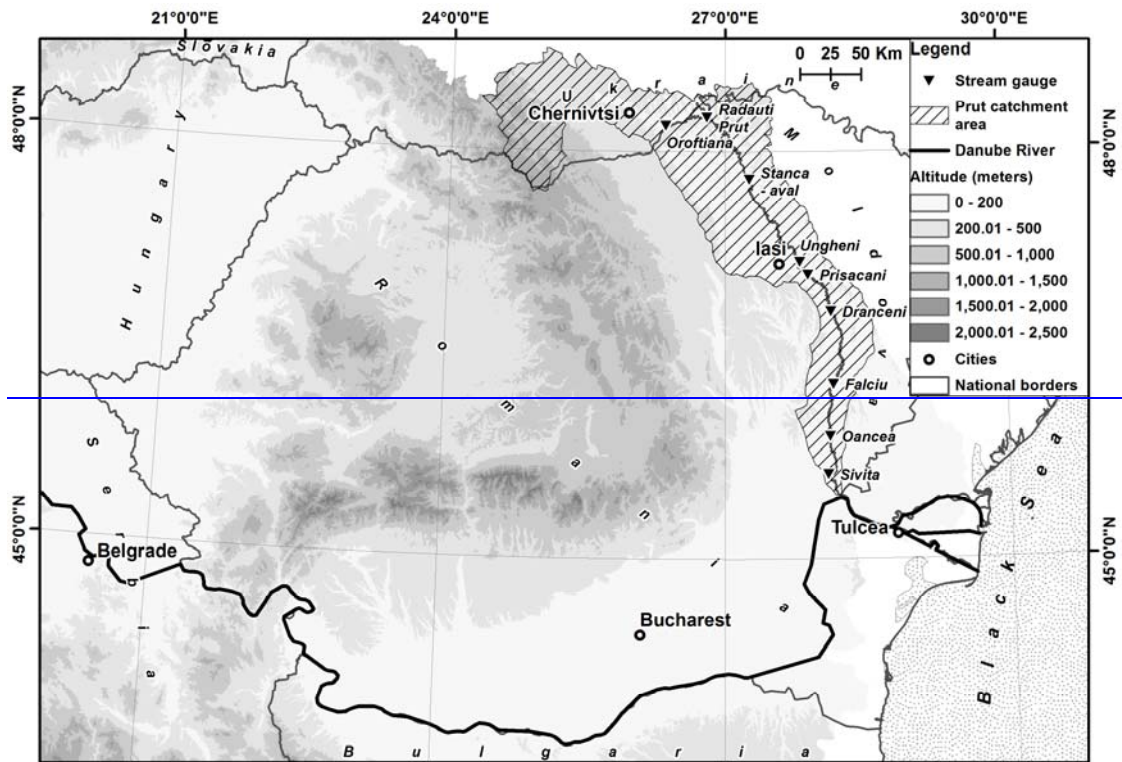

113

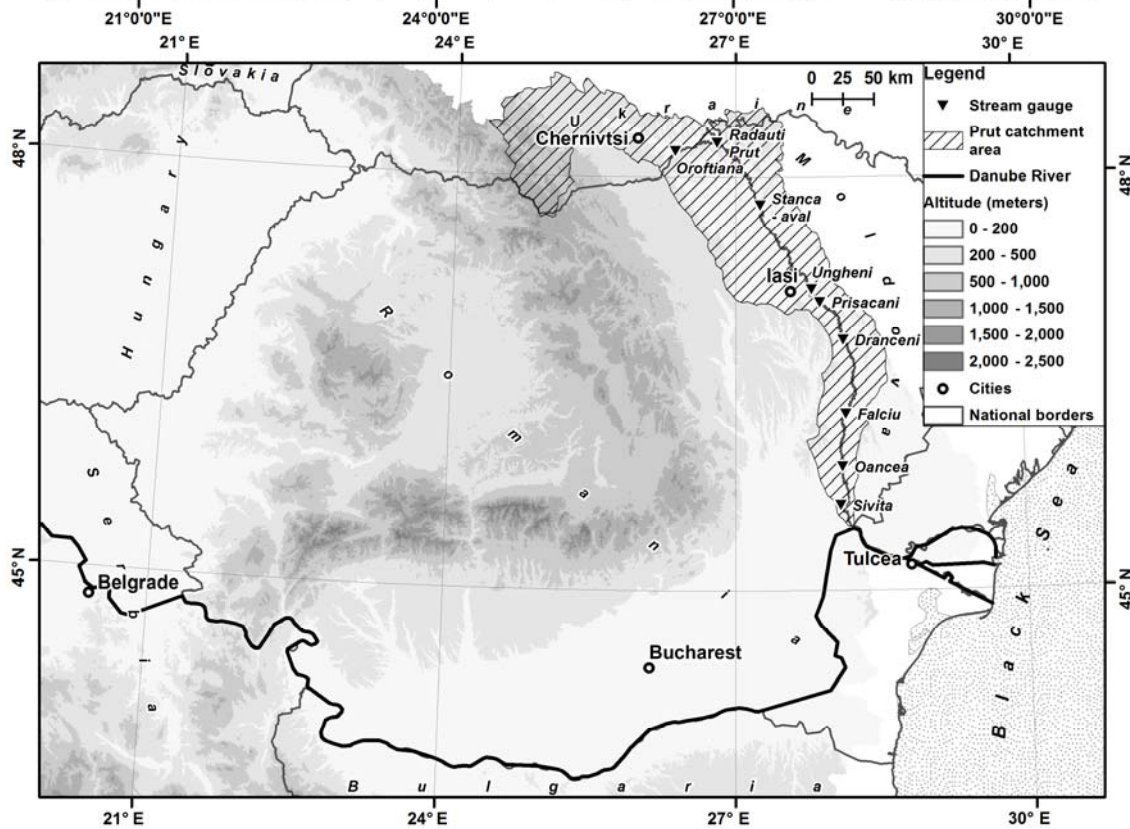

114

115

116

117

**Figure 2.** Geographic position of the Prut catchment basin in Romania, Ukraine, and the Republic of Moldova, and distribution of the main gauging stations

118 The Prut River is the second-longest river in Romania, at 952.9 km in length. It is a  
119 cross-border river, with 31 km in Ukraine and 711 km in the Republic of Moldova. The mean  
120 altitude of the midstream sector of catchment area is 130 m, and for the downstream sector is  
121 2 m.~~The mean altitude of the catchment ranges from 130 m in the centre to 2 m at the~~  
122 confluence. The Prut has 248 tributaries. Its maximum width is 12 km (in the lower reaches,  
123 Brates ~~lake~~Lake) and its average slope is 0.2%. Its hydrographic network measures 11,000 km  
124 in total, of which 3,000 km are permanent streams (33%) and 8,000 km are intermittent  
125 (67%). The network has the highest density in Romania at 0.41 km/km<sup>2</sup> (the average density  
126 is 0.33 km/km<sup>2</sup>).

127 The Prut catchment is relatively symmetrical, but its largest proportion is in  
128 Romania. To the west, it has 27 tributaries, including the Poiana, Cornesti, Isnovat, Radauti,  
129 Volovat, Basesu, Jijia (with a discharge of 10 m<sup>3</sup>/s, the most important), Mosna, Elan, Oancea,  
130 Branesti, and Chineja. The Jijia River is 275 km long, has a catchment area of 5757 km<sup>2</sup> and  
131 an annual average flow of 14 m<sup>3</sup>/s. Its most important tributaries are Miletin, Sitna and  
132 Bahlui.~~Râul Jijia are o lungime de 275 km și bazinul hidrografic deține o suprafață de 5757~~  
133 ~~km<sup>2</sup>. Cei mai importanți afluenți sunt Miletin, Sitna și Bahlui. Debitul mediu multianual este~~  
134 ~~de 14 m<sup>3</sup>/s.~~ To the east, it has 32 tributaries, including the Telenaiia, Larga, Vilia, Lopatnic,  
135 Racovetul, Ciugurlui, Kamenka, Garla Mare, Frasinul, and Mirnova (Romanescu et al.,  
136 2011a,b). The catchment basin has 225 small ponds, counting the Dracsani, which is the  
137 largest pond in Romania. Small ponds are used as drinking water for livestock or to irrigate  
138 subsistence rural households. They usually belong to individual households. Large ponds, on  
139 the other hand, have multiple uses, such as: flooding mitigation, irrigation, fish farming etc.  
140 They resisted better in time because of their significant surface and depth. Large ponds belong  
141 to rural or urban communities.~~Iazurile mici sunt utilizate pentru adăpatul animalelor sau~~  
142 ~~pentru irigații gospodăriilor. De obicei aparțin unor gospodării individuale. Iazurile mari au~~  
143 ~~întrebunțări multiple: atenuarea inundațiilor, irigații, piscicultură etc. și au rezistat în timp~~  
144 ~~deoarece dețin suprafețe și adâncimi apreciabile. Aparțin unor comunități rurale sau urbane.~~  
145 The river also has 26 large ponds, of which the most important is the Stanca-Costesti  
146 reservoir, which has the largest water volume of the interior rivers in Romania (1,400 million  
147 m<sup>3</sup>).

148 The topography of the Prut basin includes the Carpathians in the spring area and the  
149 Moldavian Plateau and the Romanian Plain near the river mouth. Arable land occupies 54.7%  
150 of the Prut catchment, while forests occupy 21.4%, perennial cultures occupy another 13.3%,  
151 and the water surface occupies only 1.19%. The mean annual temperature in the Prut  
152 catchment is 9°C, and the mean annual precipitation is 550 mm. The mean annual discharge  
153 increases downstream, varying from 82 m<sup>3</sup>/s at Radauti Prut to 86.7 m<sup>3</sup>/s at Ungheni to 93.8  
154 m<sup>3</sup>/s at the Oancea gauging station situated near the mouth over the period 1950-2008.

155 Discharges in the downstream reaches of the Prut are controlled by the Stanca-Costesti  
156 reservoir. In the Romanian Register of Large Dams, the Stanca-Costesti dam ranks 49<sup>th</sup> out of  
157 246 dams in terms of height, but 2<sup>nd</sup> in terms of active reservoir volume (1,400 million m<sup>3</sup>,  
158 after the Iron Gates I, with a volume of 2,100 million m<sup>3</sup>). It has a surface area of 5,900 ha  
159 during a normal retention level (NRL). After construction of the Stanca-Costesti reservoir,  
160 floods on the Romanian parts of the Prut diminished considerably. Because the Prut has  
161 higher banks in the Republic of Moldova, this area was not affected by dam construction. The  
162 reservoir was constructed with a mitigation level of 550 million m<sup>3</sup>, allowing the mitigation of  
163 a 1% ~~backwater~~~~tidal bore~~ from 2,940 to 700 m<sup>3</sup>/s. The damming infrastructure constructed  
164 downstream from the hydrotechnical nodes prevents the flooding of approximately 100,000  
165 ha of floodplain area (Romanescu et al., 2011a,b).

### 3 Methodology

Diverse methodology has been used to analyse exceptional floods. Hydrological data, including discharge and the water level, were obtained from the Prut-Barlad Water Basin Administration based in Iasi (a branch of the “Romanian Waters” National Administration). For catchment basins that did not have gauging stations or observation points, measurements were taken to estimate the discharge. Mathematical methods were used to reconstitute discharges and terrain measurements using land surveying equipment (Leica Total Station) were used to calculate the surface of the stream cross-section. S-a apelat la reconstituirea debitelor (metode matematice specifice debitului reconstituit și măsurători de teren pentru determinarea secțiunii active). Most stations within the Romanian portion of the Prut catchment are automatic (Fig. 3). The recording and analysing methodology used is standard or slightly adapted to local conditions: e.g. the influence of physical-geographical parameters on runoff (Ali et al., 2012; Kappes et al., 2012; Kourgialas et al., 2012; Waylen and Laporte, 1999); the management of risk situations (Delli-Priscoli and Stakhiv, 2015; Demeritt et al., 2013; Grobicki et al., 2015 Grobicki et al., 2015); the role of reservoirs in flood mitigating (Fu et al., 2014; Serban et al., 2004; Sorocovschi, 2011); the probability of flooding and the changes in the runoff regime (Hall et al., 2004, 2014; Jones, 2011; Seidu et al., 2012a,b; Wu et al., 2011); flood prevention (Hapuarachchi et al., 2011); runoff and stream flow indices (Nguimalet and Ndjendole, 2008); morphologic changes of riverbeds or lake basins (Rusnák and Lehotsky, 2014; Touchart et al., 2012; Verdu et al., 2014) etc.~~The recording and analysing methodology used is standard or slightly adapted to local conditions: influența parametrilor fizico-geografici asupra seurgerii (Ali et al., 2012; Kappes et al., 2012; Kourgialas et al., 2012; Waylen and Laporte, 1999); managementul situațiilor de risc (Delli-Priscoli and Stakhiv, 2015; Demeritt et al., 2013; Grobicki et al., 2015 Grobicki et al., 2015); rolul acumulărilor în atenuarea inundațiilor (Fu et al., 2014; Serban et al., 2004; Sorocovschi, 2011); probabilitatea de producere a inundațiilor și schimbările regimului de seurgere (Hall et al., 2004, 2014; Jones, 2011; Seidu et al., 2012a,b; Wu et al., 2011); prevenirea inundațiilor (Hapuarachchi et al., 2011); indicatori ai seurgerii (Nguimalet and Ndjendole, 2008); modificări morfologice ale albiilor de râu sau ale cuvetelor lacustre (Rusnák and Lehotsky, 2014; Touchart et al., 2012; Verdu et al., 2014).~~

The cartographic basis used to map altitudes and slopes is Shuttle Radar Topography Mission (Global Land Cover Facility, 2016), at a 1:50000 scale. The vector layers were projected within a geodatabase, using ArcGis 10.1. They include stream lines, sub-catchment basins, and reservoirs and ponds polygons, as well as gauging station points. In order to generate the GIS layers, we applied the following methods: digitisation, queries, conversion, geometries calculation (length, surface) and spatial modelling. Water levels and discharges data were processed and plotted on charts using the Open Office software. We also used the Inkscape software to design the final maps and images.



206

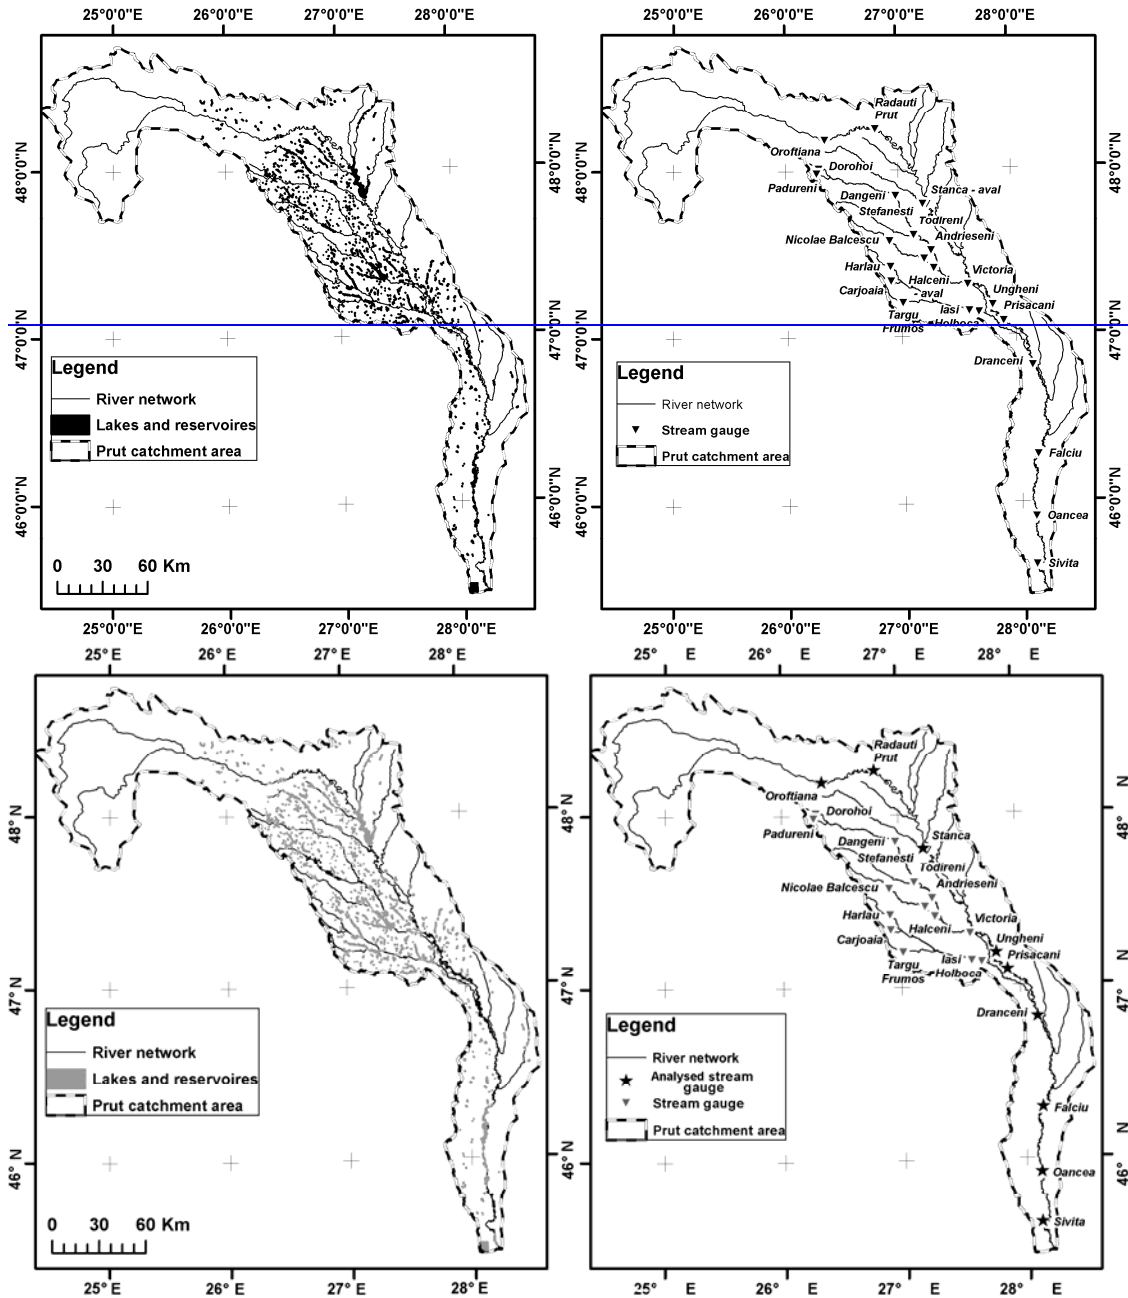

207

208

209

210

211

212

213

214

215

216

217

218

**Figure 3.** Main tributaries, reservoirs (left), and gauging stations (right) in the Prut River basin

All areas with gauging stations had automatic rain gauges (Anghel et al., 2011; Tirnovan et al., 2014a,b) (Fig. 3, Table 42). The heavy rains that cause flooding are recorded hourly over the course of 24 hours according to the Berg intensity scale (Berg et al., 2009). In the areas lacking gauging stations, data were collected from the closest meteorological stations, which are automatic and form part of the national monitoring system. The water level and discharge were analysed throughout the entire flood period. For comparison, the mean monthly and annual data for the water level and discharge were also analysed. [The processed data were portrayed as histograms that illustrate the evolution of water levels](#)

during the floods, including the CA (warning level), CI (flood level), and CP (danger level) flood threshold levels before and after the flood, the daily and monthly runoff, and the hourly variations of runoff during the backwater. The processed data were portrayed as histograms that illustrate the evolution of water levels during the floods, including the CA (warning level), CI (flood level), and CP (danger level) flood threshold levels before and after the flood, the daily and monthly runoff, and the hourly variations of runoff during the tidal bore. For an exact assessment of the damage and the flooded surface area, observations and field measurements were conducted on the major floodplains of the Volovat, Basesu, Jijia, Sitna, Miletin, Bahluiet, Bahlui, Elan, and Chineja Rivers (Romanescu and Stoleriu, 2013b).

Nine gauging stations exist in Romanian sections of the Prut River: Oroftiana (near the entry, only including water level measurements), Radauti Prut, Stanca Aval (downstream), Ungheni, Prisacani, Dranceni, Falciu, Oancea, and Sivita (which is directly influenced by the Danube, so no data were collected from this station) (Fig. 3, Table 2). The first gauging station was installed at Ungheni in 1914, and the newest station is Sivita, which was installed in 1978. Much older water level and discharge data are available from stations in other places. The data on the deviation of rainfall quantities were obtained from the Climate Prediction Center NOAA and from the scientific literature (Hustiu, 2011). Datele cu privire la abaterile cantitatilor de precipitatii au fost preluate de la Centrul de Predictie Climatică NOAA și din literatura de specialitate (Hustiu, 2011).

**Table 2.** Morphometric data for the gauging stations on the Prut River (Romania)

| Gauging station          | Inauguration year | Geographic coordinates |           | River length from the confluence<br>km | Data on the catchment basin |            | 0 m level of tide pole <sup>0</sup> mira <sup>2</sup> level<br>mrBS (Meters Black Sea)mrBS |
|--------------------------|-------------------|------------------------|-----------|----------------------------------------|-----------------------------|------------|--------------------------------------------------------------------------------------------|
|                          |                   | Latitude               | Longitude |                                        | Surface km <sup>2</sup>     | Altitude m |                                                                                            |
| Oroftiana                | 1976              | 48°11'12"              | 26°21'04" | 714                                    | 8020                        | 579        | 123.47                                                                                     |
| Radauti Prut             | 1976              | 48°14'55"              | 26°48'14" | 652                                    | 9074                        | 529        | 101.87                                                                                     |
| Stanca Aval (Downstream) | 1978              | 47°47'00"              | 27°16'00" | 554                                    | 12000                       | 480        | 62.00                                                                                      |
| Ungheni                  | 1914              | 47°11'04"              | 27°48'28" | 387                                    | 15620                       | 361        | 31.41                                                                                      |
| Prisacani                | 1976              | 47°05'19"              | 27°53'38" | 357                                    | 21300                       | 374        | 28.08                                                                                      |
| Dranceni                 | 1915              | 46°48'45"              | 28°08'04" | 284                                    | 22367                       | 310        | 18.65                                                                                      |
| Falcu                    | 1927              | 46°18'52"              | 28°09'13" | 212                                    | 25095                       | 290        | 10.04                                                                                      |
| Oancea                   | 1928              | 45°53'37"              | 28°03'04" | 88                                     | 26874                       | 279        | 6.30                                                                                       |
| Sivita                   | 1978              | 45°37'10"              | 28°05'23" | 30                                     | 27268                       | 275        | 1.66                                                                                       |

Flood damage reports were collected from city halls in the Prut catchment and the Inspectorate for emergencies in Botosani, Iasi, Vaslui, and Galati. In isolated areas, we conducted our own field research. We note that some of the reports from city halls seem exaggerated.

## 4 Results

The majority of floods in Romania are influenced by climate factors, manifesting at local and European level (Birsan, 2015; Birsan and Dumitrescu, 2014; Birsan et al., 2012; Chendes et al., 2015; Corduneanu et al., 2016). During the last decade of June (June 20, 2010) and the end of July (July 30, 2010), a baroclinic area was localized in Northern Moldavia. This

252 favoured the formation of a convergent area of humidity. In this case, a layer of humid, warm  
253 and unstable air was installed between the topographic surface and 2500 m of altitude. The  
254 high quantity of humidity originated from The Black Sea, situated 500 km away. The warm  
255 tropical air is generated by the Russian Plain, overheated by a strong continentality climate.  
256 The cold air from medium troposphere, inducted by the cut-off nucleus that generated  
257 atmospheric instability, overlapped this structure of the low troposphere (Hustiu, 2011). The  
258 synoptic context was disturbed by local physical-geographical factors, especially by the  
259 orography of Eastern Carpathians, which led to extremely powerful heavy rains: e.g. 100-200  
260 mm in 24 hours at the sources of Jijia (representing the amount that normally falls during June  
261 and July) or 40-60 mm in 24 hours at the Romanian frontier with Ukraine and the Republic of  
262 Moldova. The quantity of rainfall in 24 hours were 2-3 higher than the normal values for this  
263 period (Hustiu, 2011) (Fig. 4).~~Majoritatea inundațiilor din România sunt influențate de~~  
264 ~~condițiile climatice care se manifestă la nivel european dar și la nivel local (Birsan, 2015;~~  
265 ~~Birsan and Dumitreșcu, 2014; Birsan et al., 2012; Chendes et al., 2015; Corduneanu et al.,~~  
266 ~~2016). În ultima decadă a lunii iunie (20 iunie 2010) și sfârșitul lunii iulie (30 iulie 2010) s-a~~  
267 ~~instalat o zonă baroclină în nordul Moldovei. Aceasta a asigurat formarea unei arii~~  
268 ~~convergente de umezeală. În acest caz între suprafața topografică și altitudinea de 2500m s-a~~  
269 ~~instalat un strat de aer umed, cald și instabil. Cantitatea ridicată de umezeală provine din~~  
270 ~~Marea Neagră, situată la 500 km distanță. Aerul cald tropical este generat de Câmpia Rusă,~~  
271 ~~supraîncălzită ca urmare a continentalismului accentuat. Pe această structură a troposferei~~  
272 ~~joase s-a suprapus aerul rece din troposfera medie, antrenat de nucleul cut off care a dat~~  
273 ~~naștere instabilității atmosferice (Hustiu, 2011). Contextul sinoptic a fost perturbat de factorii~~  
274 ~~fizico-geografici locali, mai ales de orografia Carpaților Orientali, care au dus la formarea~~  
275 ~~unor ploi torențiale extrem de puternice: 100-200 mm/24 ore la izvoarele râului Jijia (cantitate~~  
276 ~~care cade în mod normal în două luni: iunie și iulie) sau de 40-60 mm/24 ore la frontiera~~  
277 ~~României cu Ucraina și Republica Moldova. Cantitățile de precipitații căzute în 24 de ore~~  
278 ~~depășesc de 2-3 ori normele climatice ale perioadei (Hustiu, 2011) (Fig. ?).~~  
279

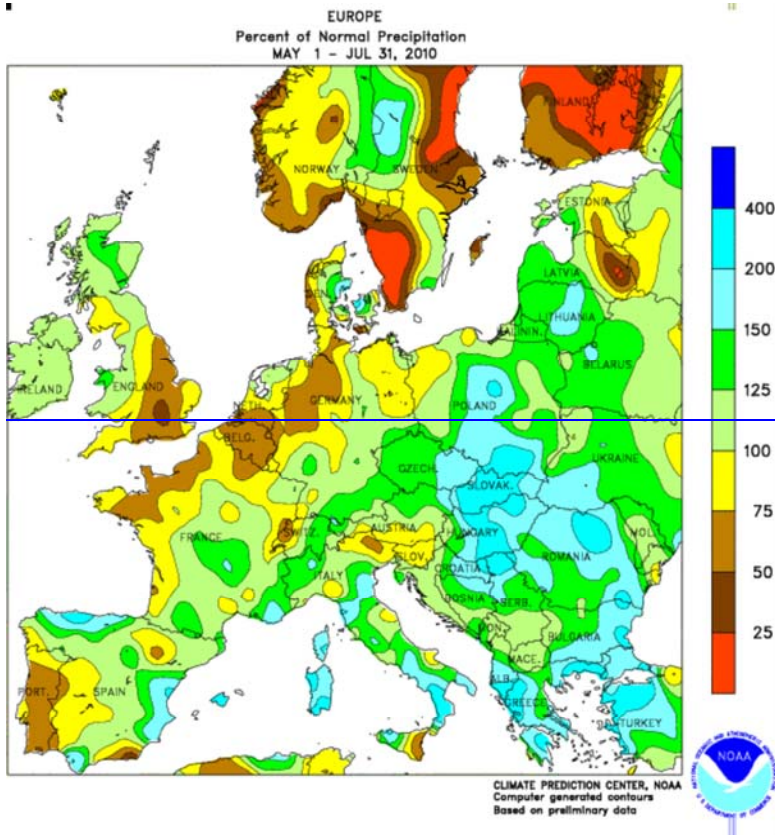

280



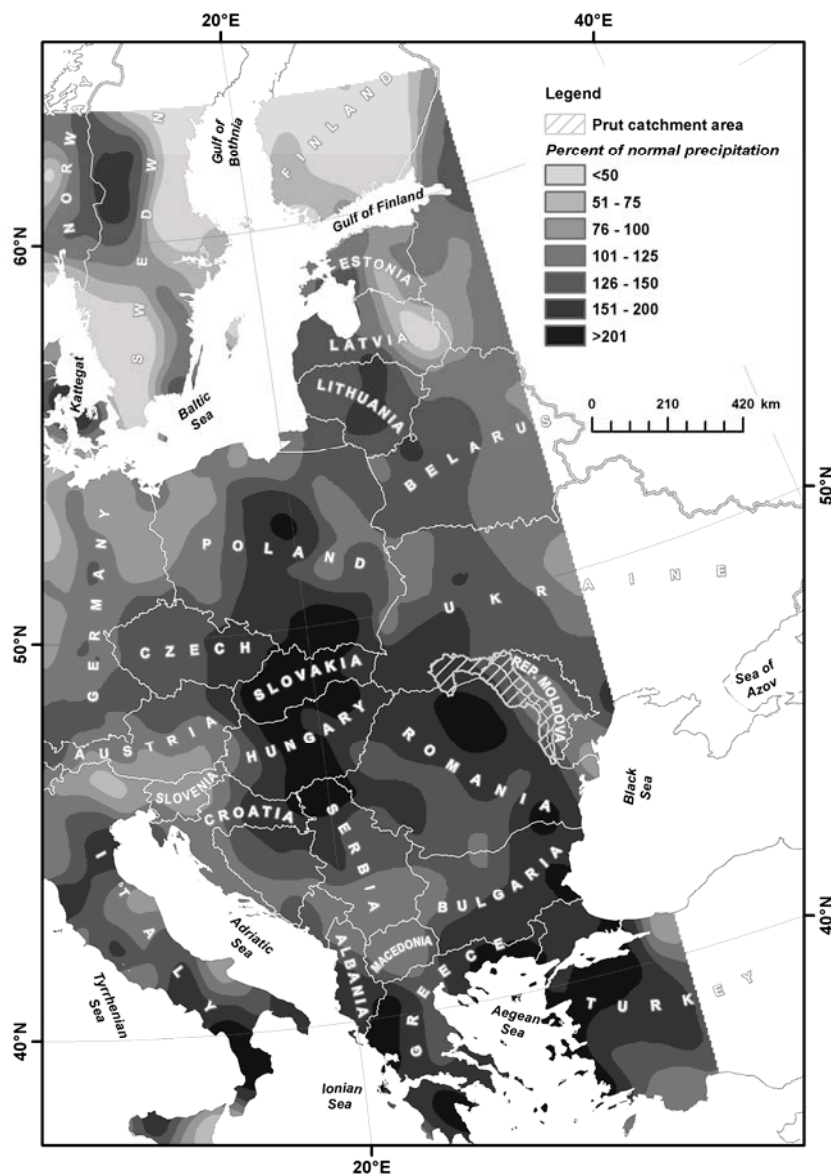

**Figure 4.** Deviation of monthly rainfall amounts (May-July 2010) from the yearly values - Climate Prediction Center (source data: NOAA) Fig. 2 Abaterea cantităților lunare de precipitații (mai-iulie 2010) față de cantitățile multianuale—CPC (NOAA)

There were 6 main extremely rainy periods in Romania, especially in the Moldavian hydrological basins (Prut and Siret): 21-23 June, 25-26 June, 28-30 June, 3-4 July, 6-7 July and 9 July. Rainfall quantities recorded in June were higher. The flash floods registered in Northern Moldavia in 28-29 June 2010 were generated by convective systems with slow spreading. Even if the rainfalls from June 29th were lower, the floods had devastating effects because they came on the context of the increasing water levels from 28 June 2010. The climate convection was organized as a mesocyclone extended over Northern Moldavia (the departments of Suceava and Botosani) (Hustiu, 2011). Pe teritoriul României s-au evidențiat 6 perioade extrem de ploioase, care s-au desfășurat, cu precădere, în bazinele hidrografice din Moldova (Prut și Siret): 21-23 iunie, 25-26 iunie, 28-30 iunie, 3-4 iulie, 6-7 iulie și 9 iulie. Cele din luna iunie sunt mai importante din punct de vedere cantitativ. Viiturile care s-au

297 produs pe 28-29 iunie 2010 în nordul Moldovei au fost generate de sisteme convective cu  
298 propagare lentă. Deși ploile din data de 29 iunie au fost mai reduse inundațiile au avut efecte  
299 distrugătoare deoarece veneau pe fondul creșterilor de nivel din data de 28 iunie 2010.  
300 Convecția climatică s-a organizat sub forma unui mezoiclone extins pe suprafața județelor din  
301 nordul Moldovei (Suceava și Botosani) (Hustiu, 2011).

302 ~~Tidal bores~~ Backwaters in the upper basins of the Prut and Siret (in northeast Romania)  
303 recorded during the summer of 2010 were caused by atmospheric instability from 21 June-1  
304 July 2010. At this time, the flood danger level (CP) was exceeded on the Prut and Jijia Rivers.  
305 High amounts of rain fell during three periods: 21-24 June 2010, 26-27 June 2010, and 28  
306 June-1 July 2010. Precipitation exceeding 100 mm was recorded from 21-24 June (105 mm,  
307 at the Oroftiana station) and from 28 June-1 July 2010 (206 mm at Padureni and 110 mm at  
308 Pomarla on the Buhai River). Very high rainfall rates occurred within a brief timeframe: 51.5  
309 mm/50 min. was recorded at Oroftiana station on the Prut River and 42.0 mm/30 min. at  
310 Padureni on the Buhai River (Romanescu and Stoleriu, 2013a,b; Tirnovan et al., 2014b) (Fig.  
311 45).

312 Precipitation in the Carpathian Mountains in Ukraine initiated a series of floods in the  
313 upper Prut basin. Among the five flood peaks recorded by the Cernauti gauging station, we  
314 noted one with a discharge of 2,070 m<sup>3</sup>/s recorded on 9 July 2010 at 12:00. In comparison,  
315 another flood recorded in May was not very high discharge values significant (308 m<sup>3</sup>/s). In the  
316 mountainous sector, the flood warning level (CA) was exceeded only twice, with water levels  
317 of 523 cm (+25 cm CA) and 645 cm (+145 cm CA) (Fig. 56).

318 At the Oroftiana gauging station, where only the water levels are measured, the  
319 flood danger level (CP) was exceeded four times, with levels of 716 cm (+66 cm CP), 743 cm  
320 (+93 cm CP), 736 cm (+86 cm CP), and 797 cm (+147 cm CP, on 9 July 2010 at 12:00). The  
321 flood warning level (CA) was exceeded throughout the entire flooding period (May-July  
322 2010). In the month of May, the flood levels (CI) were not exceeded (Fig. 56). At the  
323 Oroftiana gauging station, one registered solely the water levels data. And for all the other  
324 gauging stations the discharge data are being registered, in addition to water level. ~~La stația~~  
325 ~~hidrometrică Oroftiana sunt înregistrate doar nivelurile. La celelalte stații hidrometrice se fac~~  
326 ~~măsurători complexe.~~

327

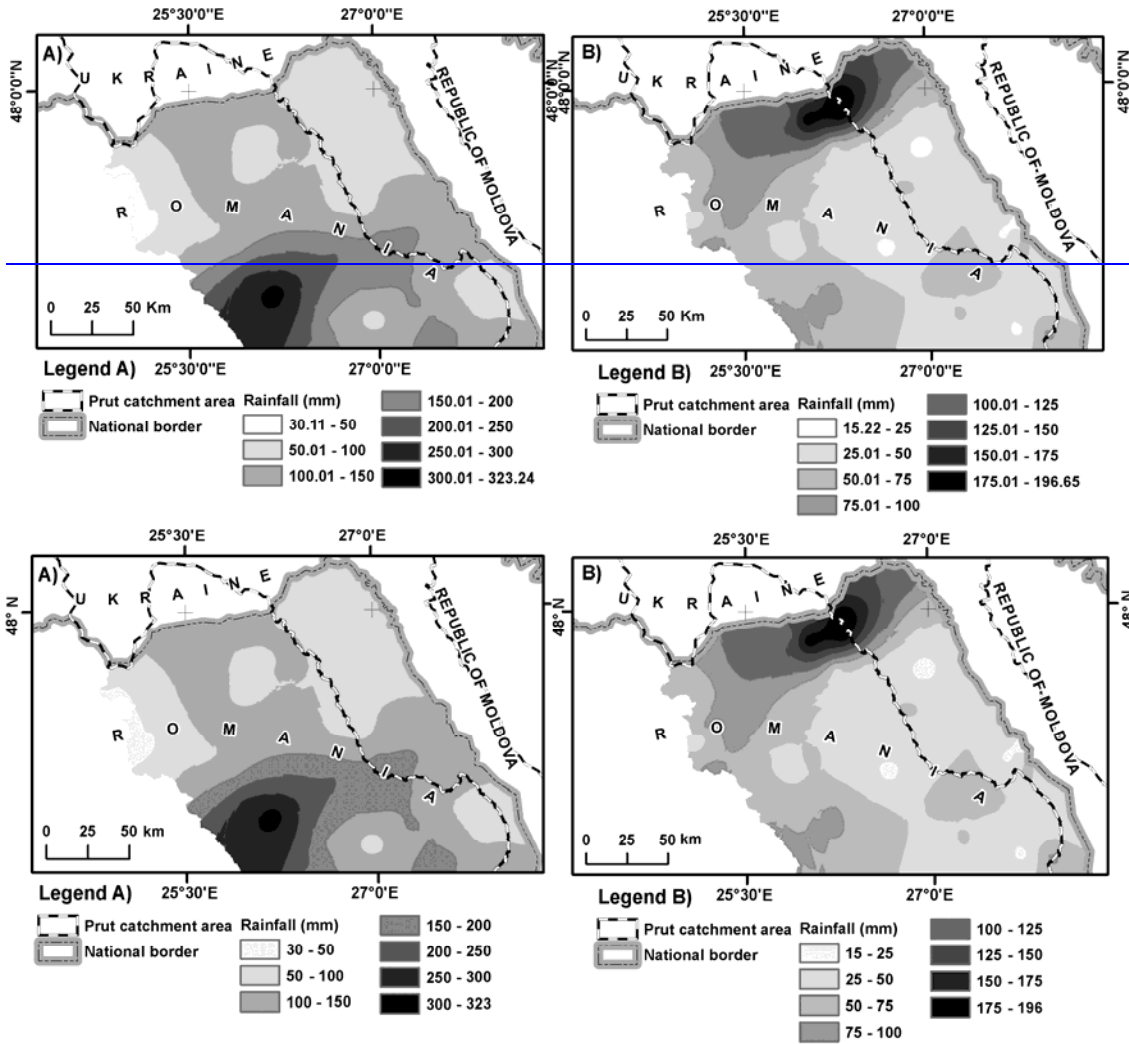

328

329

330

331

332

333

**Figure 5.** Cumulative precipitation amounts, in northeastern part of Romania, from 21-27 June 2010 (left) and 28 June-1 July 2010 (right) **Figure 4.** Cumulative precipitation amounts from 21-27 June 2010 (left) and 28 June-1 July 2010 (right)

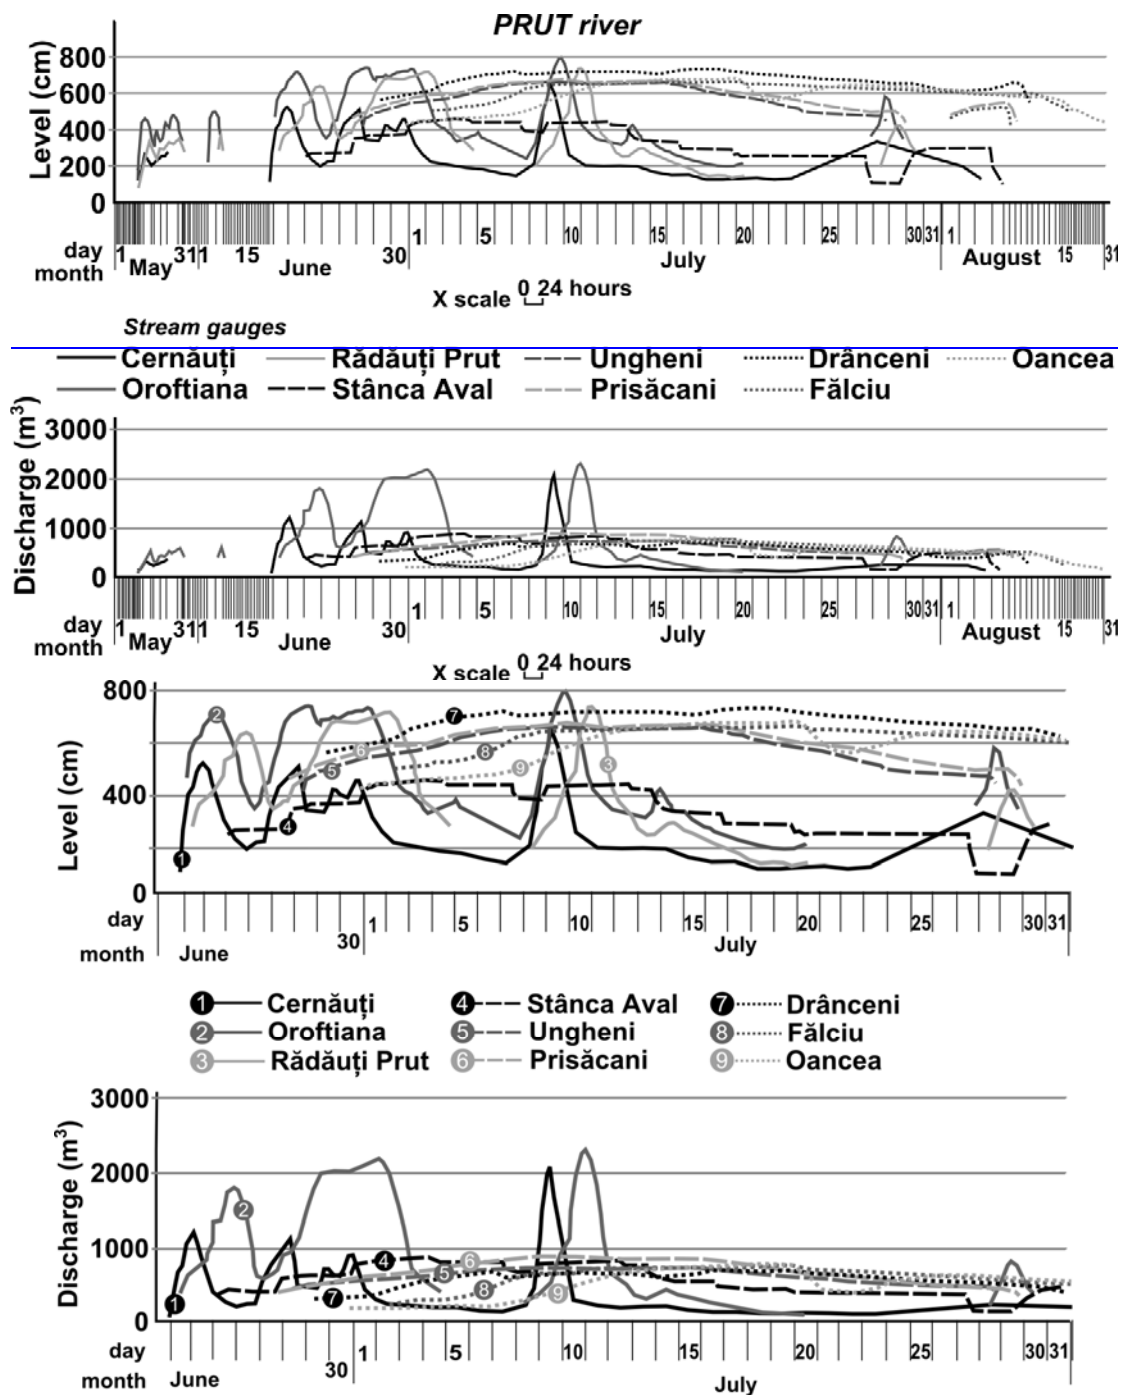

334

335  
 336 **Figure 56.** Water levels and discharge on the Prut River at the gauging stations of Cernauti,  
 337 Oroftiana, Radauti Prut, Stanca Aval (downstream), Ungheni, Prisacani, Dranceni, Falciu, and  
 338 Oancea during the summer of 2010  
 339

335

336

337

338

339

340

341

342

343

At the Radauti Prut gauging station, three important peaks were recorded on 26 June,  
 29 June-2 July 2010, and 10-11 July 2010. A maximum discharge of 2,310 m<sup>3</sup>/s was  
 registered on 10 July 2010 at 9 pm. The flood danger level (CP) was exceeded at four times,  
 with water levels of 643 cm (+43 cm CP, on 25 June 2010), 685 cm (+85 cm CP, on 29 June



344 2010), 721 cm (+121 cm CP, on 29 June-2 July 2010), and 744 cm (+144 cm CP, on 10-11  
345 July 2010) (Fig. 56).

346 The Stanca Aval (downstream) gauging station is controlled by overflow from the  
347 Stanca-Costesti reservoir. This control mitigates the flood hydrographs. The maximum  
348 discharge value at this station was 885 m<sup>3</sup>/s on 3 July 2010. The flood level (CI) was  
349 exceeded from the beginning to the end of the flooding period. The flood danger level (CP)  
350 was exceeded from 1-13 July 2010, reaching a maximum water level of 460 cm (+85 cm CP,  
351 on 3 July 2010) (Fig. 56).

352 At the Ungheni gauging station, floods were recorded throughout the entire month of  
353 July. The maximum discharge was 673 m<sup>3</sup>/s on 8 July 2010. Flooding continued until 5  
354 August 2010. The flood danger level (CP) was exceeded during the 12-day period from 6-17  
355 July 2010. The maximum water level was 661 cm (+1 cm CP) (Fig. 56).

356 Floods were also recorded throughout July at the Prisacani gauging station. The  
357 maximum discharge was 886 m<sup>3</sup>/s on 9 July 2010. Flooding continued until 5 August 2010.  
358 The flood danger level (CP) was exceeded during the 16-day period from 4-19 July 2010. The  
359 maximum water level was 673 cm (+73 cm CP) (Fig. 56).

360 At the Dranceni gauging station, floods were recorded over a long period from the end  
361 of June until the beginning of August. The maximum discharge was 718 m<sup>3</sup>/s on 17 July  
362 2010. The flood danger level (CP) was reached or exceeded during the 18-day period from 4-  
363 22 July 2010. The maximum water level was 729 cm (+29 cm CP) (Fig. 56).

364 At the Falciu gauging station, floods occurred throughout July and during the first half  
365 of August. The maximum discharge was 722 m<sup>3</sup>/s on 19 July 2010. The flood danger level  
366 (CP) was reached or exceeded during the 35-day period from 6 July-2 August 2010. The  
367 maximum water level was 655 cm (+55 cm CP) (Fig. 56).

368 At the Oancea gauging station, two ~~tidal bores~~[backwaters](#) were recorded in July and  
369 August. The first ~~tidal bore~~[backwater](#) on 19 July 2010 had a peak discharge of 697 m<sup>3</sup>/s and  
370 the second on 27 July 2010 had a peak discharge of 581 m<sup>3</sup>/s. Both ~~tidal bores~~[backwaters](#)  
371 exceeded the flood danger level (CP) throughout the month of July. The maximum water level  
372 of the first ~~backwater bore~~[backwater](#) was 683 cm (+83 cm CP), and the maximum for the second was  
373 646 cm (+46 cm CP) (Fig. 56). [Backwaters were caused by increasing water level of Danube  
374 River, which influences the measurements results at the gauging stations situated on the  
375 downstream sector of Prut River.](#)~~Undele de remuu sunt determinate de creșterile de nivel de  
376 pe fluviul Dunărea și influențează măsurătorile de la stațiile hidrometrice situate în sectorul  
377 aval al Prutului.~~

378 \_\_\_\_\_The western tributaries of the Prut (within the Moldavian Plain) are  
379 numerous, but they have only modest mean annual discharges. They are periodically affected  
380 by floods following heavy summer rains. At the Stefanesti gauging station, within the  
381 downstream sector of the Bazeu River, floods were recorded from 1-4 July 2010. The  
382 maximum discharge was 107 m<sup>3</sup>/s on 6 July 2010. The flood level (CI) was reached or  
383 exceeded for two days. The maximum level was 355 cm (+5 cm CI) (Fig. 67). [The Stefanesti  
384 gauging station is located in the downstream sector of the dam and it is directly influenced by  
385 the discharge water from the Stanca-Costesti Lake \(since 1978\).](#)~~Stația hidrometrică Stefanesti  
386 este situată în sectorul aval al barajului și este direct influențată de descărcarea apei din lacul  
387 Stâncea Costești (începând cu anul 1978).~~

388 \_\_\_\_\_At the Padureni gauging station on the Buhai River, two ~~tidal bores~~[backwaters](#)  
389 were recorded in June and a secondary ~~backwater tidal bore~~[backwater](#) in May. The maximum discharge  
390 was 470 m<sup>3</sup>/s on 28 June 2010. The flood danger level was exceeded during both  
391 ~~backwater bores~~[backwaters](#), with water levels of 470 cm (+120 cm CP, on 28 June 2010) and 440 cm  
392 (+90 cm CP, on 29 June 2010) (Figs. 3, 67).

393 At the Todireni gauging station on the Sitna River (a tributary of the Jijia), floods  
 394 occurred from 1-4 July 2010. The maximum discharge was 19 m<sup>3</sup>/s on 1, 2, and 4 July 2010.  
 395 The flood level (CI) was exceeded on 1 and 2 July 2010. The maximum water level was 387  
 396 cm on 1 July 2010. The flood warning level (CA) was exceeded on 4 July 2010 (Figs. 3, 67).

397 At the Nicolae Balcescu gauging station on the Miletin River (a tributary of the Jijia),  
 398 floods were recorded from 26-29 June 2010. The maximum discharge was 60 m<sup>3</sup>/s on 6 June  
 399 2010. The flood level (CI) was exceeded just once, on 28 June 2010. The maximum level was  
 400 444 cm (+22 cm CI). The warning level (CA) was exceeded throughout the flooding period  
 401 (Figs. 3, 67).  
 402

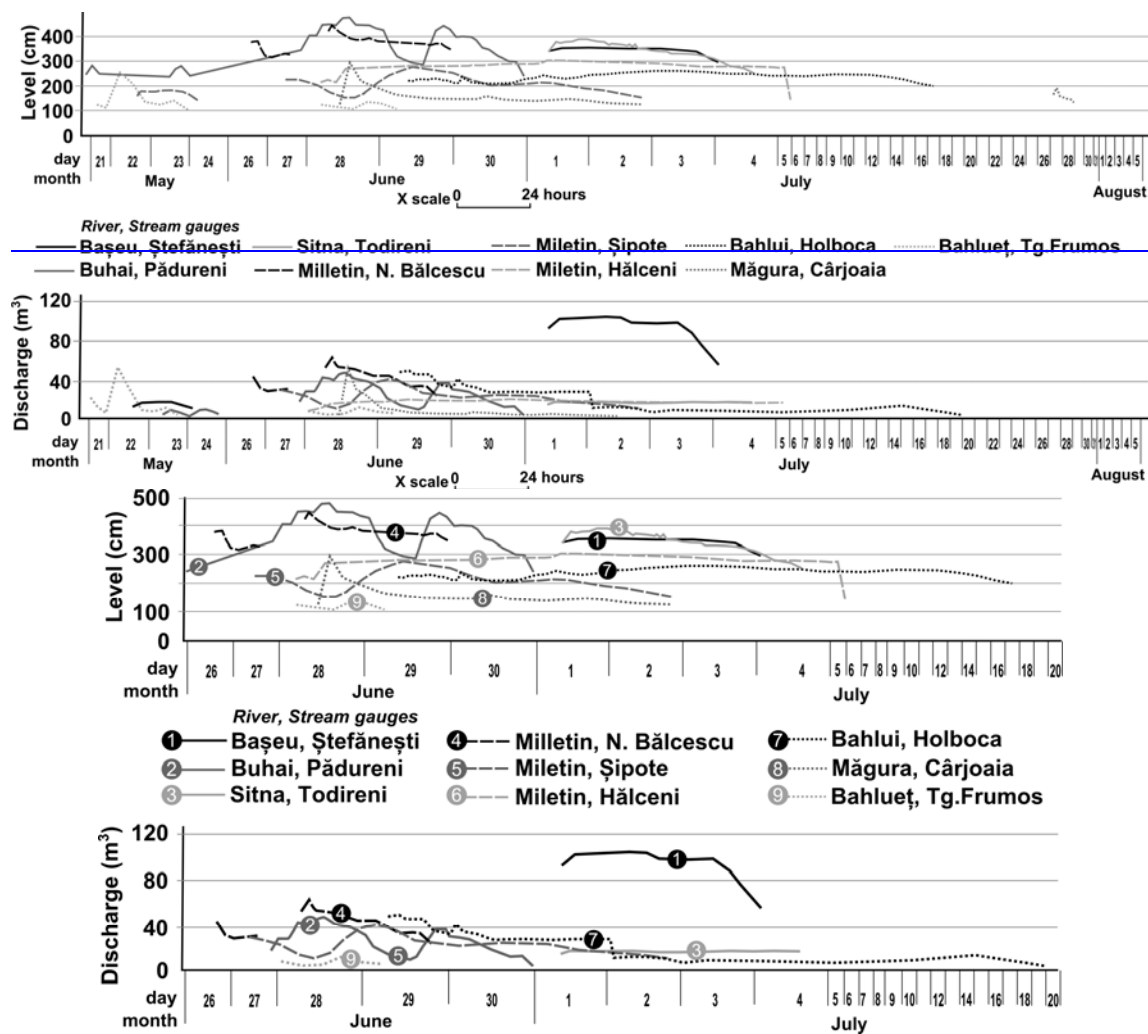

403  
 404  
 405 **Figure 67.** Water levels and discharge on the main Prut tributaries during the summer of  
 406 2010: the Baseu, Buhai, Sitna, Miletin, Bahlui, Magura, and Bahluiet Rivers  
 407

408 At the Sipote gauging station on the Miletin, four [backwater tidal bores](#)  
 409 from 22 June-2 July 2010. The maximum discharge was 45 m<sup>3</sup>/s on 29 June 2010. The flood  
 410 level (CI) was exceeded from 29-30 June 2010. The maximum water level was 269 cm (+19  
 411 cm CI). The warning level (CA) was exceeded throughout the flooding period (Figs. 3, 67).

412 At the Halcenii gauging station on the Miletin, floods were recorded from 28 June-5  
 413 July 2010. The maximum discharge was 32 m<sup>3</sup>/s on 1-2 July 2010. The flood danger level

414 (CP) was exceeded during the peak discharge period, with a water level of 302 cm (+2 cm  
415 CP). The flood level (CI) was exceeded throughout the flooding period (Figs. 3, [67](#)).

416 The Carjoaia gauging station on the Magura River (a tributary of the Bahlui), one  
417 major ~~backwatertidal bore~~ was recorded. The maximum discharge was 73.5 m<sup>3</sup>/s on 28 June  
418 2010. The flood level (CI) was exceeded on 28 June 2010. The maximum water level was 280  
419 cm (+90 cm CI) (Figs. 3, [67](#)).

420 At the Targu Frumos gauging station on the Bahluet (a tributary of the Bahlui), one  
421 major ~~backwatertidal bore~~ was recorded on 22 May 2010, with a maximum discharge of 48  
422 m<sup>3</sup>/s. The flood danger level (CP) was reached on the same day and the maximum water level  
423 was 250 cm (0 cm CP). The flood warning level (CA) was exceeded throughout the flooding  
424 period (Figs. 3, [67](#)).

425 At the Harlau gauging station on the Bahlui (a tributary of the Jijia), successive and  
426 increasing ~~backwatertidal bores~~ were recorded from 22 May-1 July 2010. The maximum  
427 discharge was 32 m<sup>3</sup>/s on 29 June 2010. The flood level (CI) was exceeded throughout the  
428 flooding period. The maximum water level was 552 cm (+132 cm CI) (Figs. 3, [67](#)).

429 At the Iasi gauging station on the Bahlui, floods occurred from 24 June-4 July 2010.  
430 The maximum discharge was 44 m<sup>3</sup>/s on 1 July 2010. The flood warning level (CA) was  
431 exceeded throughout the flood. The maximum water level was 286 cm (+86 cm CA) (Figs. 3,  
432 [67](#)).

433 At the Holboca gauging station on the Bahlui, floods were recorded from 29 June-17  
434 July 2010. The maximum discharge was 50 m<sup>3</sup>/s on 29 June 2010. The warning level (CA)  
435 was reached or exceeded throughout the flooding period. The maximum water level was 259  
436 cm (+59 cm CA) (Figs. 3, [67](#)).

437 At the Dorohoi gauging station on the Jijia, several ~~backwatertidal bores~~ were  
438 recorded from 21 May-7 July 2010. The maximum discharge was 119 m<sup>3</sup>/s on 29 June 2010.  
439 The flood danger level (CP) was exceeded from 29-30 June 2010. The maximum water level  
440 was 760 cm (+160 cm CP). The flood warning level (CA) was exceeded throughout the  
441 flooding period (Figs. 3, [78](#)).

442

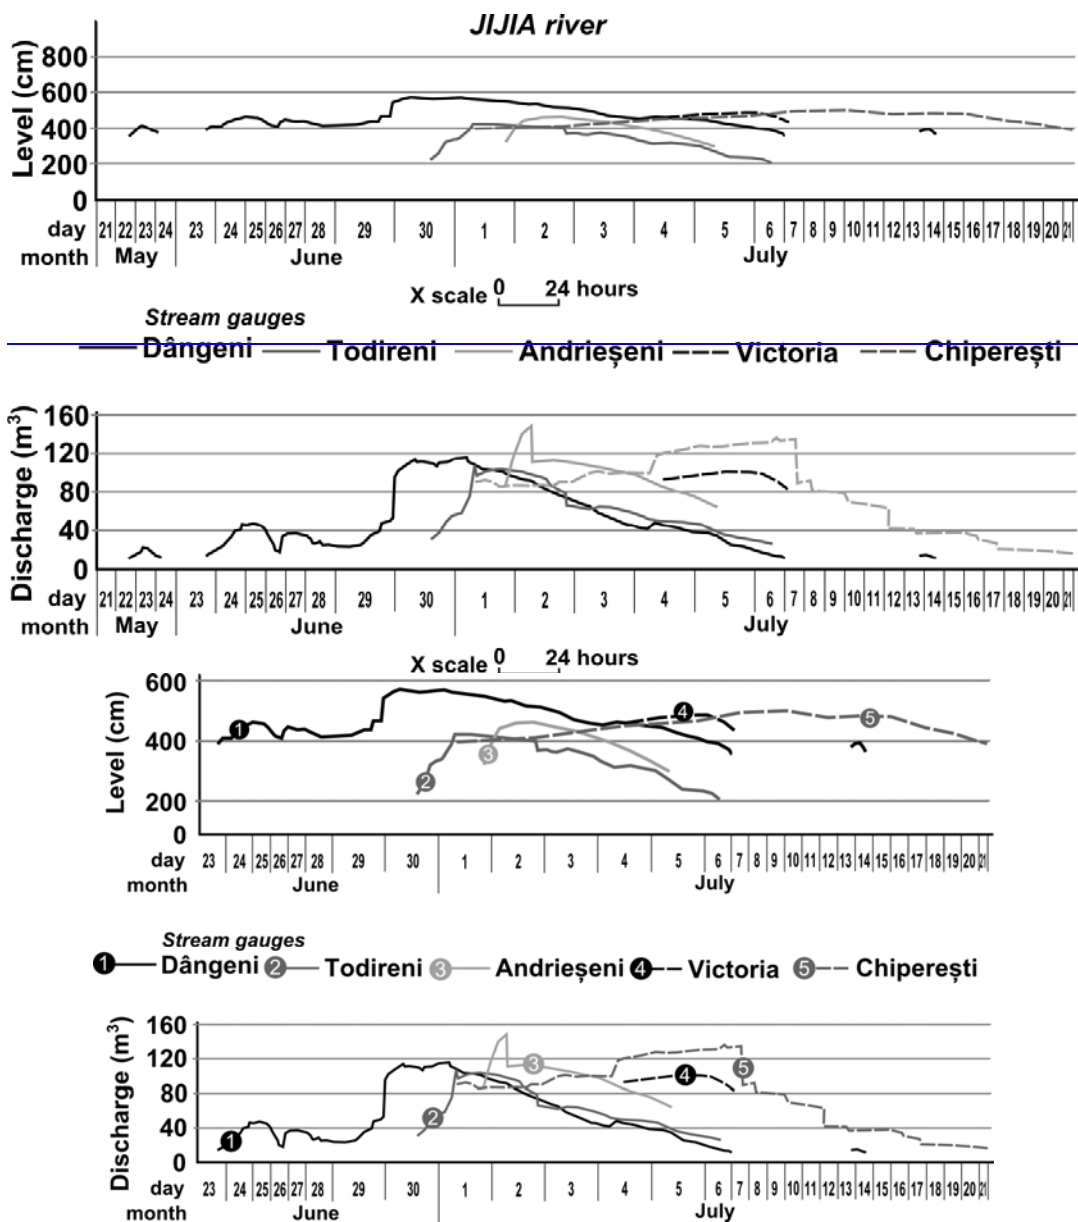

443

444

445

446

447

**Figure 78.** Water levels and discharge on the Jijia River at the gauging stations of Dângeni, Todireni, Andrieseni, Victoria, and Chiperești during the summer of 2010

448

449

450

451

452

At the Dângeni gauging station on the Jijia, several [backwater tidal bores](#) were recorded from 22 May-28 July 2010. The maximum discharge was 116 m<sup>3</sup>/s on 1 July 2010. The flood level (CI) was exceeded from 30 June-3 July 2010. The maximum water level was 578 cm (+108 cm CI). The flood warning level (CA) was exceeded throughout the flooding period (Figs. 3, 78).

453

454

455

456

At the Todireni gauging station on the Jijia, flooding occurred from 30 June-6 July 2010. The maximum discharge was 104 cm on 1 July 2010. The flood levels (CI) were exceeded from 1-4 July 2010. The maximum water level was 417 cm (+47 cm CI). The flood warning level (CA) was exceeded throughout the flooding period (Figs. 3, 78).

457

458

At the Andrieseni gauging station on the Jijia, flooding was recorded from 1-4 July 2010. The maximum discharge was 148 m<sup>3</sup>/s on 2 July 2010. The flood danger level (CP) was



459 exceeded on 2 and 3 July 2010. The maximum water level was 461 cm (+11 cm CP). The  
 460 flood warning level (CA) was exceeded throughout the flooding period (Figs. 3, 78).

461 At the Chiperesti gauging station on the Jijia, successive and increasing [backwater tidal](#)  
 462 [bores](#) were recorded from 1-19 July 2010. The maximum discharge was 136 m<sup>3</sup>/s on 6 July  
 463 2010. The flood warning level (CA) was exceeded throughout the flooding period. The  
 464 maximum water level was 497 cm (+97 cm CA) (Figs. 3, 78).

465 At the Victoria gauging station on the Jijia, flooding occurred from 4-7 July 2010. The  
 466 peak discharge was 100 m<sup>3</sup>/s on 5 July 2010. The flood warning level (CA) was exceeded  
 467 throughout the flooding period. The maximum water level was 485 cm (+35 cm CA) (Figs. 3,  
 468 78).

469 At the Capitanie A.F.D.J. gauging station on the Danube, record floods occurred. The  
 470 maximum discharge was 16,300 m<sup>3</sup>/s on 5-6 July 2010, which is a historic discharge for the  
 471 Galati station. The flood level (CI) was exceeded from 26 June-14 July 2010 (Fig. 89).  
 472

473

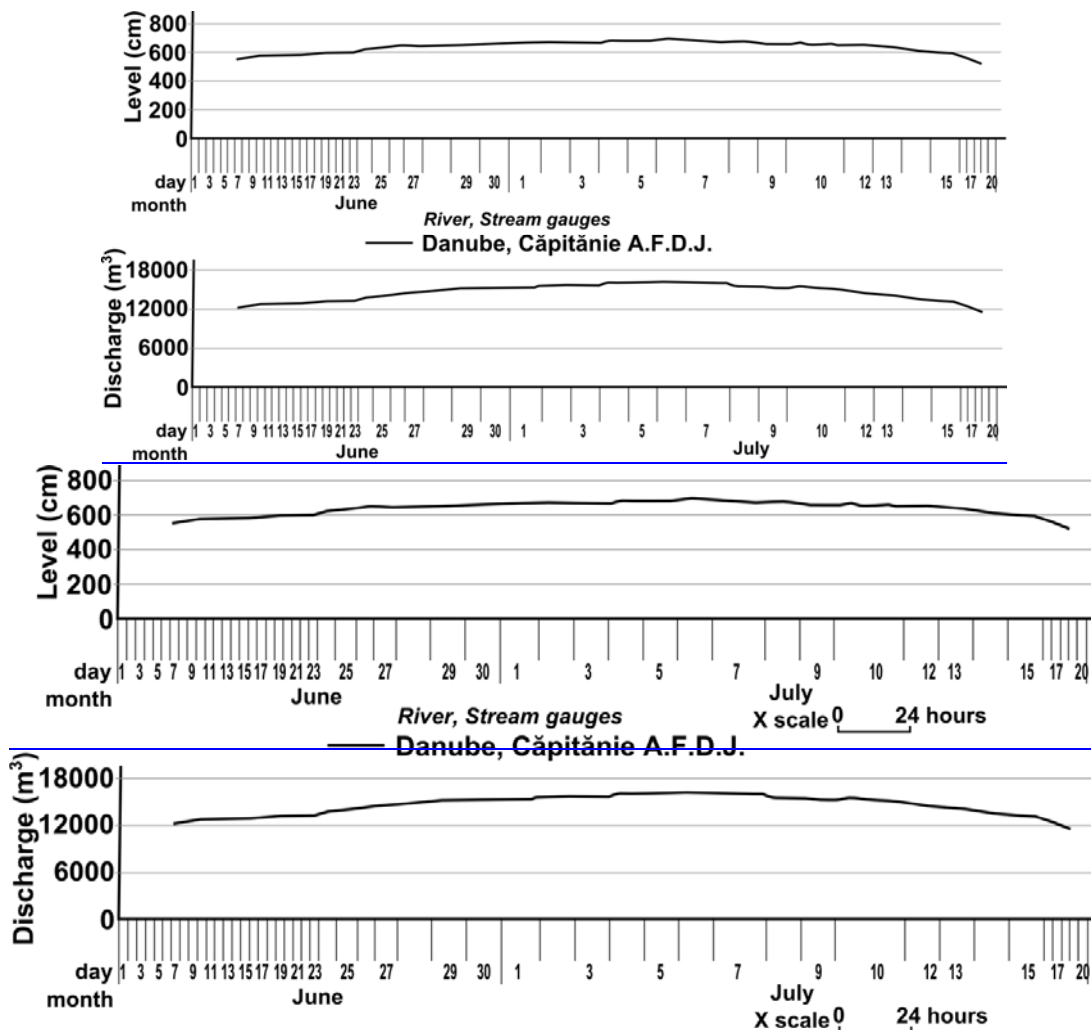

474

475 **Figure 89.** Water levels and discharge on the Danube at the Capitanie A.F.D.J. gauging  
 476 station in the summer of 2010  
 477

478

## 479 5 Discussion

479

480 Cumulative heavy rains from 21-24 June, 26-27 June, and 28 June-1 July 2010 caused water  
481 levels to exceed the flood danger level (CP) by 40-150 cm on the Prut in the Oroftiana-  
482 Radauti Prut sector and by 30-150 cm in the upper basin of the Jijia. The flood level (CI) was  
483 exceeded by 80-110 cm in the middle basin of the Jijia and in its tributaries (Sitna, Miletin,  
484 and Buhai). Discharges within the lower Jijia basin were controlled by upstream reservoirs  
485 and downstream polders in the lower reaches of the Jijia.

486 The Oroftiana gauging station only records water level measurements. The Radauti  
487 Prut gauging station may be influenced by the water stored in the Stanca-Costesti reservoir  
488 (which occurred during the historic flood of 2008) (Romanescu et al., 2011a,b). The Stanca  
489 downstream gauging station may be influenced by overflow from the Stanca-Costesti  
490 reservoir. The Oancea gauging station, situated near the mouth of the Prut, may be influenced  
491 by waters from the Danube. The water level registered at the Radauti Prut gauging station  
492 could have been influenced by the backwaters caused by Stanca-Costesti Lake. The most  
493 obvious case of backwaters was registered during the 2008 historic flood.  
494 Nivelul apei de la stația hidrometrică Radauti Prut poate fi influențat de remuul provocat în  
495 laeul Stâncea Costești. Cel mai evident caz este cel produs în timpul inundațiilor istorice din  
496 anul 2008).

497 High discharge and water levels of 2,310 m<sup>3</sup>/s and 744 cm (+144 cm CP),  
498 respectively, were recorded at the Radauti Prut gauging station. The 2010 values are  
499 remarkably significantly lower than the maximum values recorded in 2008 of 7,140 m<sup>3</sup>/s and  
500 1,130 cm (+530 cm CP) (the highest value for Romanian rivers). This value was recalculated  
501 after two years (through recomposed discharges)(prin intermediul debitelor reconstituite),  
502 resulting in a discharge of 4,240 m<sup>3</sup>/s, which is the second highest value in Romania (after the  
503 historic discharge of 4,650 m<sup>3</sup>/s on the Siret in 2005) (Romanescu et al., 2011a,b). The  
504 existence of five backwatertidal bore peaks (with the second and third backwatertidal bores  
505 being weaker) clearly indicates that they were caused by heavy rains in the Carpathian  
506 Mountains in Ukraine. A volume of 200-400 mm of rainfall (ie 50-80% of the annual amount)  
507 was recorded between 1 May and 15 July 2010. During the flood manifested in 2008, a  
508 historic discharge value was registered for Prut River, but the by-passed water volume was  
509 low (in upstream of Stanca-Costesti dam) because the flood duration was short. The 2010  
510 flood registered lower maximum discharges compare to 2008, but it by-passed a larger water  
511 volume, as flood lasted longer. În perioada 1 mai 15 iulie 2010 s-au înregistrat precipitații  
512 euprinse între 200-400 mm (adică 50-80% din norma anuală). Viitura din anul 2008 a  
513 înregistrat debitul istoric pentru râul Prut dar volumul de apă tranzitat a fost redus (amonte de  
514 barajul Stâncea Costești) deoarece durata fenomenului a fost scurtă. Viitura din anul 2010 a  
515 înregistrat debite maxime mai reduse dar a tranzitat un volum mai mare de apă deoarece  
516 durata fenomenului a fost îndelungată.

517 The flood hydrographs recorded at the Stanca Aval (downstream) gauging station  
518 features flattened and relatively uniform backwatertidal bores, mostly in the central part of the  
519 river. This behaviour is due to the influence of Stanca-Costesti reservoir, which significantly  
520 reduced the maximum discharge at Stanca Aval (885 m<sup>3</sup>/s) compared to the Radauti Prut  
521 gauging station upstream of the reservoir. The water level was maintained within the upper  
522 limit recorded by longitudinal protection dams.

523

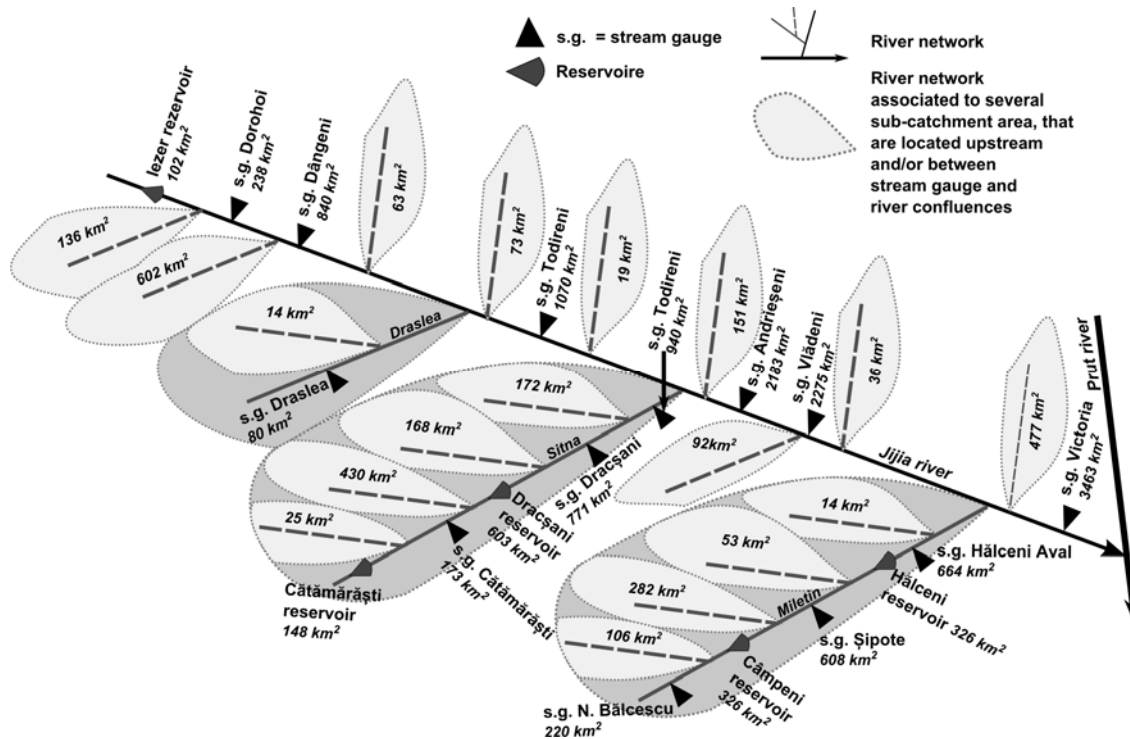

**Figure 910.** Distribution of sub-basins within the Jijia catchment and placement of the main ponds

524  
525  
526  
527  
528 The Ungheni, Prisacani, Dranceni, and Falciu gauging stations had a flattened and  
529 uniform ~~backwater tidal bore~~, which signifies upstream control, including some of the  
530 tributaries. The flood danger level (CP) was exceeded by a few centimetres and the floodplain  
531 was partially flooded in these areas. The high discharges recorded at the Prisacani station  
532 occurred because of waters in the upper Prut basin, including controlled spills from the  
533 Stanca-Costesti reservoir. Downstream of the Prisacani station, the influence of the Jijia  
534 becomes obvious: it increases the water level and lengthens the duration of floods.

535 Stronger floods within the middle reaches of the Prut occur because of its tributaries.  
536 Flooding on the Baseu, Sitna, Miletin, Jijia, Bahluet, and Bahlui Rivers was strong, but it was  
537 mitigated for the most part by the existence of ponds (Fig. 910). Therefore, the excess water  
538 entering Romania from Ukraine entered the Stanca-Costesti reservoir. The excess water  
539 downstream of the Stanca-Costesti reservoir came from tributaries. Discharge from the  
540 tributaries is controlled by hydrotechnical works within each tributary's catchment. The Jijia  
541 and Bahlui catchments are 80% developed. The water levels downstream of these tributaries,  
542 in the lower reaches of the Prut, are mitigated by the extreme width of the Prut floodplain (the  
543 most important wetland of the interior Romanian rivers).

544 The system of polders in the lower reaches of the Jijia served as an effective trap for  
545 surplus water. High discharges on the Danube, which reached a historic maximum of 16,300  
546 m<sup>3</sup>/s at Galati (July 5th, 2010), would have flooded the city centre without the precincts  
547 constructed on the Jijia that stopped a portion of the floodwaters. When the floods on the  
548 Danube ceased, the water was gradually eliminated from the polders ~~was eliminated~~  
549 ~~gradually~~, which explains why high water levels persisted in the lower Prut for a long time  
550 (Fig. 1011).  
551

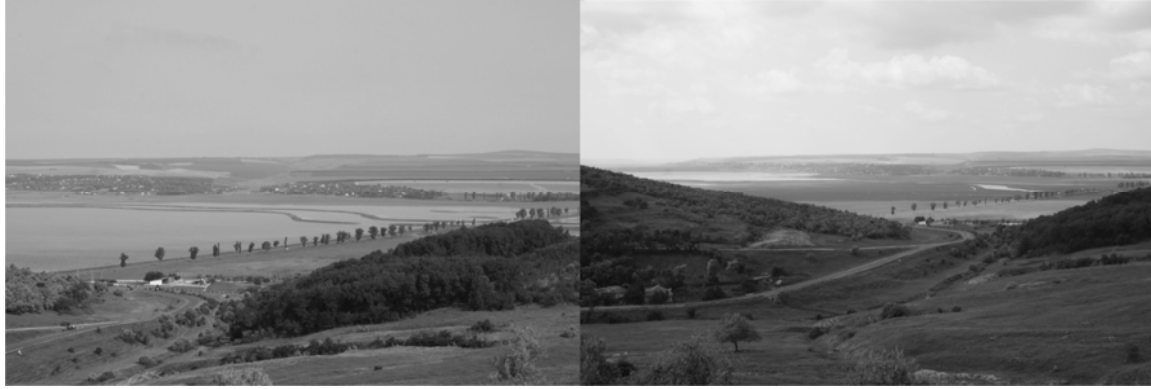

**Figure 1011.** Polders on the Jijia and the floods recorded in the summer of 2010: storage of excess water (left) and its elimination (right)

Discharge at the Oancea gauging station increased dramatically from 4-5 July 2010, coinciding with the increased discharge on the Danube at Galati. The ~~backwatertidal bore~~ at Oancea was also enhanced by backwater from the Danube. The second ~~backwatertidal bore~~ was caused by upstream contributions. The flood danger level (CP) at Oancea was exceeded by +83 cm (CP) during the first ~~backwatertidal bore~~ and by +46 cm (CP) during the second ~~backwatertidal bore~~ (Table 3). ~~The discharge increase and the historic values registered were caused by several factors, such as: the water input from the upstream sector of Prut River and the water input added by the Danube backwaters. Creșterea debitului și înregistrarea unui nivel record se datorează cumulului de factori: aport de apă din sectorul amonte al râului Prut; aport de apă prin intermediul remuului provocat de Dunăre.~~

**Table 3.** Values of CA, CI, and CP for the Oancea (Prut) and Galati (Danube) gauging stations.

| Gauging station | CA<br>(Warning level) | CI<br>(Flood level) | CP<br>(Danger level) |
|-----------------|-----------------------|---------------------|----------------------|
| Oancea (Prut)   | 440                   | 550                 | 600                  |
| Galati (Danube) | 560                   | 600                 | 660                  |

The city of Galati is situated at the confluence of the Prut and the Danube Rivers. Thus, water at the Oancea station may be influenced by the Danube and the Prut. In the summer of 2010, the highest values of discharge and water level at Galati were recorded (Tables 4, 5). The control of flooding on the Prut meant that floodwaters in Galati reached the sector of banks where flood infrastructure had been developed (the sea-cliff) as well as the lower areas of the city (Fig. 1012).

**Table 4.** Maximum water levels during flooding in the summer of 2010 for the Danube compared to values from other flood years.

| River  | Gauging station | Maximum levels in the year (cm) |      |      |      |      |
|--------|-----------------|---------------------------------|------|------|------|------|
|        |                 | 2010                            | 2006 | 2005 | 1981 | 1970 |
| Danube | Galati          | 678                             | 661  | 600  | 580  | 595  |
|        | Isaccea         | 537                             | 524  | 481  | 490  | 507  |
|        | Tulcea          | 439                             | 437  | 399  | 415  | 429  |

**Table 5.** Maximum discharges during flooding in the summer of 2010 for the Danube compared to the maximum values from 2006.

| River | Gauging station | Maximum discharges in the year (m <sup>3</sup> /s) |
|-------|-----------------|----------------------------------------------------|
|-------|-----------------|----------------------------------------------------|

|        |         | 2010  | 2006  |
|--------|---------|-------|-------|
| Danube | Galati  | 16300 | 14220 |
|        | Isaccea | 16240 | 14325 |
|        | Tulcea  | 6117  | 5768  |

582  
583  
584  
585  
586  
587  
588  
589

Discharges and water levels in the middle sector of the Prut River (recorded at the Oroftiana, Radauti Prut, and Stanca Aval stations) rank third in the hierarchy of floods (after 2008 and 2005). Values for the tributaries (particularly the Jijia, Buhai, Miletin, and Sitna) rank first in the hierarchy of floods (Table 6).

**Table 6.** Maximum water levels during flooding in the summer of 2010 compared to 2008 and 2005.

| River   | Gauging station      | Maximum level cm | Day    | Hour  | Difference from the three levels of danger Cm | Maximum level 2008 cm | Maximum level 2005 cm |
|---------|----------------------|------------------|--------|-------|-----------------------------------------------|-----------------------|-----------------------|
| Prut    | Oroftiana            | 717              | 24.06  | 11    | +67 CP                                        | 867                   | 703                   |
|         |                      | 744              | 28.06  | 11-12 | +94 CP                                        | -                     | -                     |
|         |                      | 737              | 1.07   | 04    | +87 CP                                        | -                     | -                     |
|         |                      | 797              | 9.07   | 17-18 | +147 CP                                       | -                     | -                     |
|         |                      | 425              | 13.07  | 20    | +75 CA                                        | -                     | -                     |
| Prut    | Radauti Prut         | 643              | 25.06  | 18-19 | +43 CP                                        | 1130                  | 680                   |
|         |                      | 686              | 29.06  | 17    | +86 CP                                        | -                     | -                     |
|         |                      | 722              | 1.07   | 23    | +122 CP                                       | -                     | -                     |
|         |                      | 744              | 10.07  | 19-20 | +144 CP                                       | -                     | -                     |
| Prut    | Stanca<br>Downstream | 461              | 3.07   | 15-22 | +86 CP                                        | 512                   | 331                   |
| Jijia   | Dorohoi              | 750              | 29.06  | 09    | +150 CP                                       | 558                   | 646                   |
|         |                      | 722              | 30.06  | 05    | +122 CP                                       | -                     | -                     |
|         |                      | 630              | 30.06  | 17    | +30 CP                                        | -                     | -                     |
| Jijia   | Dangeni              | 575              | 30.06  | 08    | +105 CI                                       | 449                   | 512                   |
|         |                      | 579              | 1.07   | 05    | +109 CI                                       | -                     | -                     |
| Jijia   | Todireni             | 417              | 1.07   | 08    | +77 CI                                        | 123                   | 420                   |
| Buhai   | Padureni             | 470              | 28.06  | 19-20 | +120 CP                                       | 292                   | -                     |
| Miletin | Nicolae<br>Balcescu  | 444              | 28.06  | 15    | +24 CI                                        | 286                   | 334                   |
|         |                      | Miletin          | Sipote | 226   | 27.06                                         | 12                    | +76 CA                |
|         |                      | 269              | 29.06  | 18    | +19 CI                                        | -                     | -                     |
| Miletin | Halceni              | 302              | 1.07   | 15-18 | +2 CP                                         | 226                   | 238                   |
| Sitna   | Todireni             | 378              | 1.07   | 17    | +28 CI                                        | -                     | -                     |

590  
591  
592  
593  
594  
595  
596

The floods recorded in the summer of 2010 in the Buhai catchment (a tributary of the Jijia, which is a tributary of the Prut) caused backwaters to emerge at the mouth of the river. The manifestation of this backwater phenomenon is unique because the floodwaters of the Buhai River climbed the Ezer dam (on the Jijia River) and flooded its lacustrine cuvette. The phenomenon was named “spider flow” (Romanescu and Stoleriu, 2013a,b) (Fig. [4213](#)).



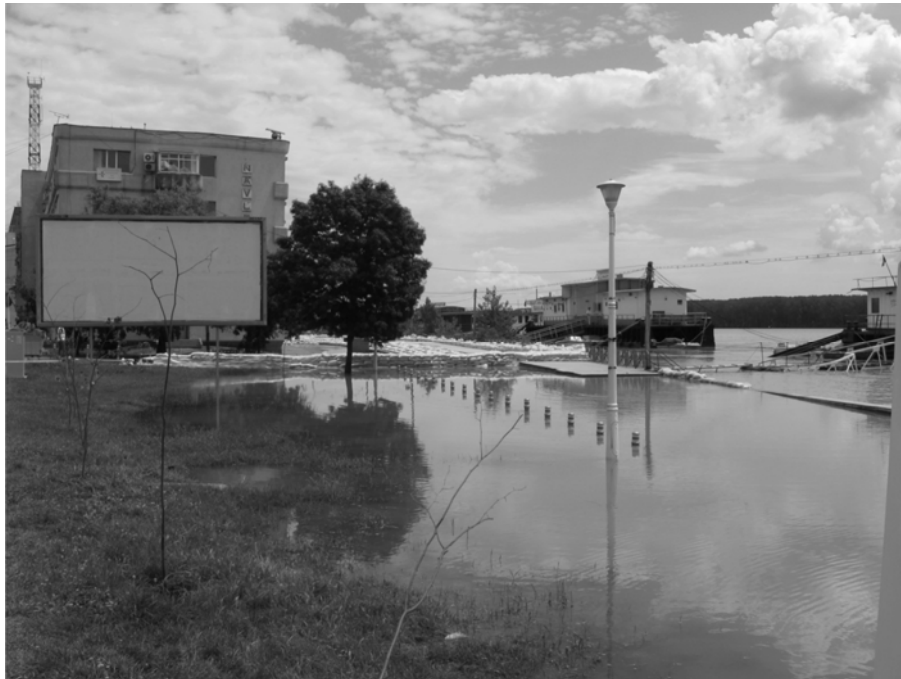

597  
598

**Figure 11.2.** Flooding of the sea-cliff and the NAVROM headquarters in Galati

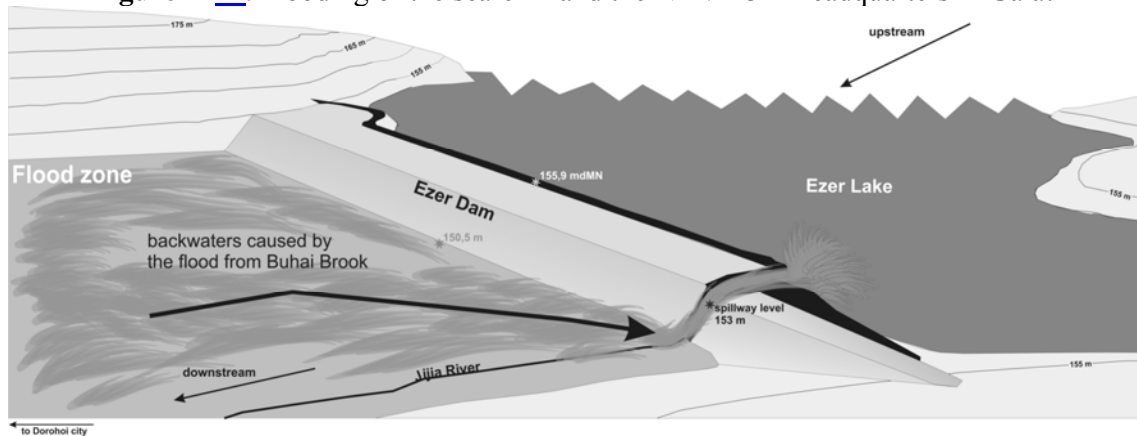

599

**Figure 13.** The “spider flow” phenomenon in which the Buhai waters climbed the Ezer dam on the Jijia, in the area of confluence of the two rivers

600  
601  
602

## 6 Conclusions

603

604

605

606

607

608

609

610

611

612

613

614

615

In the summer of 2010, large amount of significant precipitation occurred in Central and Eastern Europe. Heavy rains in northeast Romania caused devastating floods in the Prut and Siret basins. Romania incurred huge economic damages. The flooding in 2010 was comparable with previous strong flood years in 2005, 2006, and 2008 in Romania. The greatest damage occurred in, and the most arable area was destroyed in, the middle Prut basin in the Jijia-Bahlui Depression- of the Moldavian Plain.

Discharge in the downstream sector of the Prut was controlled by the Stanca-Costesti reservoir, which ranks 2<sup>nd</sup> in Romania in terms of active reservoir volume (1,400 million m<sup>3</sup>, after the Iron Gates I, with 2,100 million m<sup>3</sup>). It has a surface area of 5,900 ha for a normal retention level (NRLNR). Under normal circumstances, the Stanca-Costesti reservoir can retain enough water to control the downstream discharge and water level. The

616 provision of an attenuation water volume (550 million m<sup>3</sup>) within the lake basin is efficient in  
 617 retaining a 1% probability flood (reducing it from 2,940 m<sup>3</sup>/s to 700 m<sup>3</sup>/s). Together with the  
 618 embankments located on the dam downstream sector, it helps preventing the flooding of  
 619 100,000 hectares of meadow. At a normal retention level, Stanca-Costesti Lake has a total  
 620 area of 5,900 ha and a water volume of 1.4 billion m<sup>3</sup>. Prevederea unui volum de apă de  
 621 atenuare (550 milioane m<sup>3</sup>) în cadrul lacului face ca viitura cu probabilitate de 1% să fie  
 622 atenuată de la 2940 m<sup>3</sup>/s la 700 m<sup>3</sup>/s. Împreună cu îndiguirile efectuate în aval de baraj se  
 623 evită inundarea a 100000 ha de luncă. La Nivelul Normal de retenție lacul însumează o  
 624 suprafață de 5900 ha și un volum de apă de 1400 milioane m<sup>3</sup>.

625 Discharges downstream of the Stanca-Costesti reservoir are controlled by reservoirs  
 626 and retention systems constructed on the main tributaries of the Prut. We emphasize that the  
 627 Jijia and Bahlui catchments have hydrotechnical works on 80% of their surface areas. The  
 628 system of polders in the downstream sector of the Jijia River was used extensively to mitigate  
 629 discharge and prevent the city of Galati from flooding (Galati is the largest Danubian port,  
 630 situated at the confluence of the Prut and the Danube Rivers).

631 The gauging stations in the lower sector of the Prut recorded high discharges and  
 632 water levels because of excess water coming from upstream (the middle sector of the Prut). At  
 633 the Oancea gauging station, however, which is situated near the discharge of the Prut into the  
 634 Danube, there is a significant backwater influence. The Danube had historic discharge at  
 635 Galati, which affected the water level at Oancea station on the Prut.

636 Floods during the summer of 2010, in northeast Romania, rank third among  
 637 hydrological disasters in Romanian history after the floods of 2005 and 2008, which also  
 638 occurred in the Siret and Prut catchments. The 2010 floods caused grave economic damage  
 639 (almost one billion Euros in just the Prut catchment) and greatly affected agriculture.  
 640 Furthermore, six people died in Dorohoi, on the Buhai River.  
 641

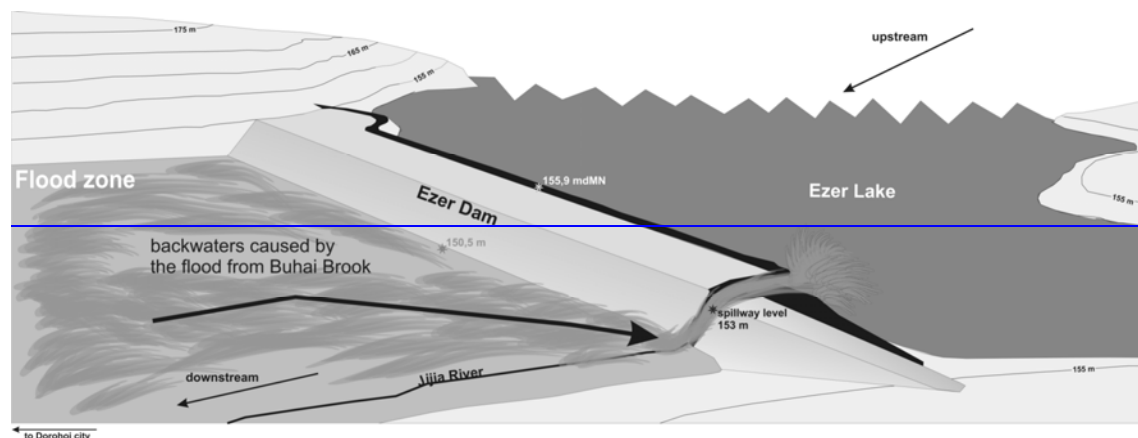

642 **Figure 12.** The “spider flow” phenomenon in which the Buhai waters climbed the Ezer dam  
 643 on the Jijia, in the area of confluence of the two rivers  
 644

645  
 646 The 2010 floods caused a unique backwater phenomenon at the mouth of the Buhai  
 647 River. Floodwaters from the Buhai climbed the Ezer dam (situated on the Jijia River) and  
 648 flooded its lacustrine cuvette. The phenomenon was called “spider flow”. In order to avoid  
 649 such phenomena it is necessary to increase the height of the overflow structure. The  
 650 phenomenon was called “spider flow”. Pentru evitarea unor asemenea fenomene este necesară  
 651 supraînălțarea deversorului de ape mari.  
 652

653 *Acknowledgments.* This work was supported by the Partnership in Priority Domains project  
654 PN-II-PT-PCCA-2013-4-2234 no. 314/2014 of the Romanian National Research Council,  
655 called “Non-destructive approaches to complex archaeological sites. An integrated applied  
656 research model for cultural heritage management” – [arheoinvest.uaic.ro/research/prospect](http://arheoinvest.uaic.ro/research/prospect).  
657 The authors would like to express their gratitude to the employees of the Romanian Waters  
658 Agency Bucharest, Siret Water Administration Bacau, particularly to Jora Ionut, PhD, a  
659 hydrologist within this research and administration agency, who was kind enough to provide a  
660 significant part of the data used in the present study.

661

## 662 **References**

663

664 Ahilan, S., O'Sullivan, J.J., and Bruen, M.: Influences on flood frequency distributions in Irish  
665 river catchments, *Hydrol. Earth Syst. Sc.*, 16, 1137-1150, 2012.

666 Alfieri, L., Burek, P., Feyen, L., and Forzieri, G.: Global warming increase the frequency of  
667 river floods in Europe, *Hydrol. Earth Syst. Sc.*, 12, 1119-1152, 2015.

668 Ali, G., Tetzlaff, D., Soulsby, C., and McDonnell, J.J.: Topographic, pedologic and climatic  
669 interactions influencing streamflow generation at multiple catchment scales, *Hydrol.*  
670 *Process.*, 26(25), 3858-3874, 2012.

671 Andrei, S., Georgescu, M., Stefanescu, V., and Valciu, C.: Blocajul atmosferic euro-atlantic si  
672 fenomenele meteorologice severe induse de persistenta sa in zona Romaniei in cursul  
673 anului 2010, *Revista Stiintifica a Administratiei Nationale de Meteorologie*, 77-90,  
674 2011-, ([in romanian](#)).

675 Anghel, E., Frimescu, L., Baci, O., Simota, M., and Gheorghe, C.: Caracterizarea viiturilor  
676 exceptionale din 2010, *Institutul National de Hidrologie si Gospodarie a Apelor*,  
677 *Conferinta Stiintifica Jubiliara*, 28-30 September 2010, 178-190, 2011-, ([in romanian](#)).

678 Berg, P., Haerter, J.O., Thejll, P., Piani, C., Hagemann, S., and Christensen, J.H.: Seasonal  
679 characteristics of the relationship between daily precipitation intensity and surface  
680 temperature, *J. Geophys. Res.*, 114(D18102), 1-9, 2009. doi:10.1029/2009JD012008.

681 Berariu, R., Fikar, C., Gronalt, M., and Hirsch, P.: Understanding the impact of cascade  
682 effects of natural disasters on disaster relief operations, *Int. J. Disaster Risk Reduct.*,  
683 12, 350-356, 2015.

684 Birsan, M.V.: Trends in monthly natural streamflow in Romania and linkages to atmospheric  
685 circulation in the North Atlantic, *Water Resour. Manag.*, 29(9), 3305-3313, 2015.

686 Birsan, M.V., and Dumitrescu, A.: Snow variability in Romania in connection to large-scale  
687 atmospheric circulation, *Int. J. Climatol.*, 34, 134-144, 2014.

688 Birsan, M.V., Zaharia, L., Chendes, V., and Branescu, E.: Recent trends in streamflow in  
689 Romania (1976-2005), *Rom. Rep. Phys.*, 64(1), 275-280, 2012.

690 Bissolli, P., Friedrich, K., Rapp, J., and Ziese, M.: Flooding in eastern central Europe in May  
691 2010 – reasons, evolution and climatological assessment, *Weather*, 66(6), 147-153,  
692 2011.

693 Blöschl, G., Nester, T., Komma, J., Parajka, J., and Perdigão, R.A.P.: The June 2013 flood in  
694 the Upper Danube Basin, and comparisons with the 2002, 1954 and 1899 floods,  
695 *Hydrol. Earth Syst. Sc.*, 17, 5197-5212, 2013.

696 Bostan, D., Mihaila, D., and Tanasa, I.: The abundant precipitations in the period 22nd – 27th  
697 of July, 2008, from Suceava county and the surrounding areas. Causes and  
698 consequences, *Riscuri si catastrofe*, 8(6), 61-70, 2009.

699 Brilly, M., and Polic, M.: Public perception of flood risks, flood forecasting and mitigation,  
700 *Nat. Hazards Earth Syst. Sci.*, 5(3), 345-355, 2005.

- 701 Cammerer, H., Thieken, A.H., and Verburg, P.H.: Spatio-temporal dynamics in the flood  
702 exposure due to land use changes in the Alpine Lech Valley in Tyrol (Austria), *Nat.*  
703 *Hazards*, 68(3), 1243-1270, 2012.
- 704 Chendes, V., Corbus, C., and Petras, N.: Characterisycics of April 2005 flood event and  
705 affected areas in the Timis-Bega Plain (Romania) analysed by hydrologic, hydraulic  
706 and GIS methods, 15th International Multidisciplinary Scientific GeoConference,  
707 SGEM2015, 1, 121-128, 2015.
- 708 Corduneanu, F., Bucur, D., Cimpeanu, S.M., Apostol, I.C., and Strugariu, Al.: Hazards  
709 Resulting from Hydrological Extremes in the Upstream Catchment of the Prut River,  
710 *Water Resour.*, 43(1), 42-47, 2016.
- 711 Delli-Priscoli, J., and Stakhiv, E.: Water-Related Disaster Risk Reduction (DRR)  
712 Management in the United States: Floods and Storm Surges, *Water Policy*,  
713 17(suppl.1), 58–88, 2015.
- 714 Demeritt, D., Nobert, S., Clake, H.L., and Pappenberger, F.: The European Flood Alert  
715 System and the communication, perception, and use of ensemble predictions for  
716 operational flood risk management, *Hydrol. Process.*, 27(1), 147-157, 2013.
- 717 Detrembleurs, S., Stilmant, F., Dewals, B., Erpicum, S., Archambeau, P., and Piroton, M.:  
718 Impacts of climate changes on future flood damage on the river Meuse, with a  
719 distributed uncertainty analysis, *Nat. Hazards*, 2015. Doi:10.1007/s11069-015-1661-6.
- 720 Diakakis, M.: Rainfall thresholds for flood triggering. The case of Marathonas in Greece, *Nat.*  
721 *Hazards*, 60(3), 789-800, 2011.
- 722 European Commission: A new EU Floods Directive 2007/60/EC, available at:  
723 [http://ec.europa.eu/environment/water/flood\\_risk/index.htm](http://ec.europa.eu/environment/water/flood_risk/index.htm)(last access: March 2010),  
724 2007.
- 725 Feldman, D., Contreras, S., Karlin, B., Basolo, V., Matthew, R., Sanders, B., Houston, D.,  
726 Cheung, W., Goodrich, K., Reyes, A., Serrano, K., Schubert, J., and Luke, A.:  
727 Communicating flood risk: Looking back and forward at traditional and social media  
728 outlets, *Int. J. Disaster Risk Reduct.*, 15, 43-51, 2016.
- 729 Fu, X., Li, A.Q., and Wang, H.: Allocation of Flood Control Capacity for a Multireservoir  
730 System Located at the Yangtze River Basin, *Water Resour. Manag.*, 28(13), 4823-  
731 4834, 2014.
- 732 [Global Land Cover Facility: http://glcfapp.glcf.umd.edu:8080/esdi/](http://glcfapp.glcf.umd.edu:8080/esdi/), last access: 11 January  
733 2016
- 734 Grobicki, A., MacLeod, F., and Pischke, F.: Integrated policies and practices for flood and  
735 drought risk management, *Water Policy*, 17, 180-194, 2015.
- 736 Hall, J., Rubio, E., and Anderson, M.: Random sets of probability measures in slope  
737 hydrology and stability analysis, *J. Appl. Math. Mech.- USS.*, 84(10-11), 710-720,  
738 2004.
- 739 Hall, J. Arheimer, B., Borga, M., Brázdil, R., Claps, P., Kiss, A., Kjeldsen, T.R.,  
740 Kriaučiūnienė, J., Kundzewicz, Z.W., Lang, M., Llasat, M.C., Macdonald, N.,  
741 McIntyre, N., Mediero, L., Merz, B., Merz, R., Molnar, P., Montanari, A., Neuhold,  
742 C., Parajka, J., Perdigão, R.A.P., Plavcová, L., Rogger, M., Salinas, J.L., Sauquet, E.,  
743 Schär, C., Szolgay, J., Viglione, A., and Blöschl, G.: Understanding flood regime  
744 changes in Europe: a state-of-the-art assessment, *Hydrol. Earth Syst. Sc.*, 18, 2735-  
745 2772, 2014.
- 746 Hapuarachchi, H.A.P., Wang, Q.J., and Pagano, T.C.: A review of advances in flash flood  
747 forecasting, *Hydrol. Process.*, 25(18), 2271-2784, 2011.
- 748 Hufschmidt, G., Crozier, M., and Glade, T.: Evolution of natural risk: research framework and  
749 perspectives, *Nat. Hazards Earth Syst. Sci.*, 5(3), 375-387, 2005.

750 Hustiu, M.C.: Structuri mezoscalare ce produc inundatii de tip "flash flood" in Podisul  
751 Moldovei, *Revista Stiintifica a Administratiei Nationale de Meteorologie*, 1-16, 2011.

752 ICPDR: Floods in the Danube River Basin. Brief overview of key events and lessons learned,  
753 International Commission for the Protection of the Danube River,  
754 [icpdr\\_flood\\_report\\_2010.pdf](#), 2010, [\(in romanian\)](#).

755 Iosub, M., Enea, A., Hapciuc, O.E., Romanescu, R., and Minea, I.: Flood risk assessment for  
756 the Ozana river sector corresponding to Leghin village (Romania), 14th SGEM  
757 GeoConference on Water Resources. Forest, Marine And Ocean Ecosystems,  
758 [www.sgem.org](#), SGEM2014 Conference Proceedings, June 19-25, 2014, 1, 315-328,  
759 2014. DOI: 10.5593/SGEM2014/B31/S12.041.

760 Jones, J.A.: Hydrologic responses to climate change: considering geographic context and  
761 alternative hypotheses, *Hydrol. Process.*, 25(12), 1996-2000, 2011.

762 Jora, I., and Romanescu, G.: Hydrograph of the flows of the most important high floods in  
763 Vaslui river basin, *Air and water components of the environment*, 91-102, 2010.

764 Kappes, M.S., Keiler, M., Elverfeldt, K., and Glade, T.: Challenges of analyzing multi-hazard  
765 risk: a review, *Nat. Hazards*, 64(2), 1925-1958, 2012.

766 Kourgialas, N.N., Karatzas, G.P., and Nikolaidis, N.P.: Development of a thresholds approach  
767 for real-time flash flood prediction in complex geomorphological river basins, *Hydrol.*  
768 *Process.*, 26(10), 1478-1494, 2012.

769 Lichter, M., and Klein, M.: The effect of river floods on the morphology of small river  
770 mouths in the southeastern Mediterranean, *Z. Geomorphol. N.F.*, 55(3), 317-340,  
771 2011.

772 Lóczy, D., and Gyenizse, P.: Fluvial micromorphology influenced by tillage on a Danubian  
773 floodplain in Hungary, *Z. Geomorphol. N.F.*, 55(Suppl 1), 67-76, 2011.

774 Lóczy, D., Kis, E., and Schweitzer, F.: Local flood hazards assessed from channel  
775 morphometry along the Tisza River in Hungary, *Geomorphology*, 113(3-4), 200-209,  
776 2009.

777 Lóczy, D., Mátrai, I., Fehér, G., and Váradi, Z.: Ecological Evaluation of the Baja-Bezdan  
778 Canal (Hungary-Serbia) for Reconstruction Planning, *Water Resour. Manag.*, 28(3),  
779 815-831, 2014.

780 Merz, B., Hall, J., Disse, M., and Schumann, A.: Fluvial flood risk management in a changing  
781 world, *Nat. Hazards Earth Syst. Sci.*, 10, 509-527, 2010.

782 Mierla, M., and Romanescu, G.: Method to Assess the Extreme Hydrological Events in  
783 Danube Fluvial Delta, *Air and Water Components of the Environment*, 149-157, 2012.

784 Mierla, M., Romanescu, G., Nichersu, I., and Grigoras, I.: Hydrological risk map for the  
785 Danube Delta – a case study of floods within the fluvial delta, *IEEE J. Sel. Top. Appl.*,  
786 8(1), 98-104, 2015.

787 Miha-Pintilie, A., and Romanescu, G.: Determining the potential hydrological risk associated  
788 to maximum flow in small hydrological sub-basins with torrential character of the  
789 river Bahlui, *Present Environment and Sustainable Development*, 5(2), 255-266, 2011.

790 Moel de, H., Alphen van, J., and Aerts, J.C.J.H.: Flood maps in Europe - methods, availability  
791 and use, *Nat. Hazards Earth Syst. Sci.*, 9, 289-301, 2009.

792 Nguimalet, C.R., and Ndjendole, S.: Les extrêmes hydrologiques: des indicateurs  
793 d'hydrodynamisme ou d'hydraulicité du plateau gréseux de Mouka-Ouadda sur la  
794 rivière Pipi a Ouadda (République Centrafricaine), *Z. Geomorphol. N.F.*, 52(1), 125-  
795 141, 2008.

796 Parker, D., and Fordham, M.: An evaluation of flood forecasting, warning and response  
797 systems in the European Union, *Water Resour. Manag.*, 10(4), 279-302, 1996.



- 798 Podani, M., and Zavoianu, I.: Cauzele si efectele inundatiilor produse in luna iulie 1991 in  
799 Moldova, *Studii si cercetari de geografie*, 39, 71-78, 1992-, [\(in romanian\)](#).
- 800 Prudhomme, C., and Geneviev, M.: Can atmospheric circulation be linked to flooding in  
801 Europe? *Hydrol. Process.*, 25(7), 1180-1190, 2011.
- 802 Reti, K.O., Malos, C.V., and Manciuila, I.D.: Hydrological risk study in the Damuc village,  
803 the Neamt county, *J. Environ. Prot. Ecol.*, 15(1), 142-148, 2014.
- 804 Retsö, D.: Documentary evidence of historical floods and extreme rainfall events in Sweden  
805 1400-1800, *Hydrol. Earth Syst. Sc.*, 19, 1307-1323, 2015.
- 806 Revuelto, J., López-Moreno, J.I., Azorín-Molina, C., Arguedas, G., Vicente-Serrano, S.M.,  
807 and Serreta, A.: Utilización de técnicas de láser escáner terrestre en la monitorización  
808 de procesos geomorfológicos dinámicos: el manto de nieve y heleros en áreas de  
809 montaña, *Cuadernos de Investigación Geográfica*, 39(2), 335-357, 2013.
- 810 Reza Ghanbarpour, M., Saravi, M.M., and Salimi, S.: Floodplain Inundation Analysis  
811 Combined with Contingent Valuation: Implications for Sustainable Flood Risk  
812 Management, *Water Resour. Manag.*, 28(9), 2491-2505, 2014.
- 813 Riegger, T., Bieberstein, A., Hörtkorn, H., and Kempfert, H.G.: Stabilisation of river dykes  
814 with drainage elements, *Nat. Hazards Earth Syst. Sci.*, 9, 2039–2047, 2009.
- 815 Rufat, S., Tate, E., Burton, C., and Maroof, A.S.: Social vulnerability to floods: Review of  
816 case studies and implications for management, *Int. J. Disaster Risk Reduct.*, 14(4),  
817 470-486, 2015.
- 818 Romanescu, G., Jora, I., and Stoleriu, C.: The most important high floods in Vaslui river basin  
819 – causes and consequences, *Carpath. J. Earth Env.*, 6(1), 119-132, 2011a.
- 820 Romanescu, G., Stoleriu, C., and Romanescu, A.M.: Water reservoirs and the risk of  
821 accidental flood occurrence. Case study: Stanca–Costesti reservoir and the historical  
822 floods of the Prut river in the period July–August 2008, Romania, *Hydrol. Process.*,  
823 25(13), 2056-2070, 2011b.
- 824 Romanescu, G., Zaharia, C., and Stoleriu, C.: Long-term changes in average annual liquid  
825 flow river Miletin (Moldavian Plain), *Carpath. J. Earth Env.*, 7(1), 161-170, 2012.
- 826 Romanescu, G., Cretu, M.A., Sandu, I.G., Paun, E., and Sandu, I.: Chemism of Streams  
827 Within the Siret and Prut Drainage Basins: Water Resources and Management, *Rev.*  
828 *Chim. (Bucharest)*, 64(12), 1416-1421, 2013.
- 829 Romanescu, G., and Stoleriu, C.: Causes and Effects of the Catastrophic Flooding on the Siret  
830 River (Romania) in July-August 2008, *Nat. Hazards*, 69, 1351-1367, 2013a.
- 831 Romanescu, G., and Stoleriu, C.: An inter-basin backwater overflow (the Buhai Brook and the  
832 Ezer reservoir on the Jijia River, Romania), *Hydrol. Process.*, 28(7), 3118-3131,  
833 2013b.
- 834 Romanescu, G., and Nicu, C.: Risk maps for gully erosion processes affecting archaeological  
835 sites in Moldavia, Romania, *Z. Geomorphol. N.F.*, 58(4), 509-523, 2014.
- 836 Romanescu, G., Sandu, I., Stoleriu, C., and Sandu, I.G.: Water Resources in Romania and  
837 Their Quality in the Main Lacustrine Basins, *Rev. Chim. (Bucharest)*, 63(3), 344-349,  
838 2014a.
- 839 Romanescu, G., Tarnovan, A., Sandu, I.G., Cojoc, G.M., Dascalita, D., and Sandu, I.: The  
840 Quality of Surface Waters in the Suha Hydrographic Basin (Oriental Carpathian  
841 Mountains), *Rev. Chim. (Bucharest)*, 65(10), 1168-1171, 2014b.
- 842 Romanescu, G., Zaharia, C., Paun, E., Machidon, O., and Paraschiv, V.: Depletion of  
843 watercourses in north-eastern Romania. Case study: the Miletin river, *Carpath. J. Earth*  
844 *Env.*, 9(1), 209-220, 2014c.
- 845 Rusnák, M., and Lehotsky, M.: Time-focused investigation of river channel morphological  
846 changes due to extreme floods, *Z. Geomorphol. N.F.*, 58(2), 251-266, 2014.

- 847 Schneider, C., Laize, C.L.R., Acreman, M.C., and Flörke, M.: How will climate change  
848 modify river flow regimes in Europe? *Hydrol. Earth Syst. Sc.*, 17, 325-339, 2013.
- 849 Seidu, O., Ramsay, A., and Nistor, I.: Climate change impacts on extreme floods I: combining  
850 imperfect deterministic simulations and non-stationary frequency analysis, *Nat.*  
851 *Hazards*, 61(2), 647-659, 2012a.
- 852 Seidu, O., Ramsay, A., and Nistor, I.: Climate change impacts on extreme floods II:  
853 Improving dlood future peaks simulation using non-stationary frequency analysis, *Nat.*  
854 *Hazards*, 60(2), 715-726, 2012b.
- 855 Serban, G., Sorocovschi, V., and Fodorean, I.: Riscuri induse de amenajarea hidrotehnica a  
856 iazurilor de pe Valea Sesului (Campia Transilvaniei), *Riscuri si catastrofe*, 1, 159-172,  
857 2004-, [\(in romanian\)](#).
- 858 Sorocovschi, V.: The classification of hydrological hazards. A point of view, *Riscuri si*  
859 *catastrofe*, 9(2), 33-44, 2011.
- 860 Strupczewski, W.G., Kochanek, K., and Bogdanowicz, E.: Flood frequency analysis  
861 supported by the largest historical flood, *Nat. Hazards Earth Syst. Sci.*, 14, 1543-1551,  
862 2014.
- 863 Szalinska, W., Otop, I., and Tokarczyk, T.: Precipitation extremes during flooding in the Odra  
864 River Basin in May-June 2010, *Meteorology, Hydrology and Water Management*,  
865 2(1), 13-20, 2014.
- 866 Thielen, A.H., Bessel, T., Kienzler, S., Kreibich, H., Müller, M., Pisi, S., and Schröter, K.:  
867 The flood of June 2013 in Germany: how much do we know about its impacts? *Nat.*  
868 *Hazards Earth Syst. Sci.*, 16, 1519–1540, 2016.
- 869 Timu, M.D.: Vara anului 2010 - intre normal si atipic, *Revista Stiintifica a Administratiei*  
870 *Nationale de Meteorologie*, 91-98, 2011-, [\(in romanian\)](#).
- 871 Tirnovan, A., Romanescu, G., and Cojoc, M.G.: Floods and drought - hydroclimatic risk in  
872 Suha river basin, *Air and Water. Components of the Environment*, 188-195, 2014a.
- 873 Tirnovan, A., Romanescu, G., Cojoc, G.M., and Stoleriu, C.: Flash floods on a forested and  
874 heavily populated catchment. Case study for Suha basin (Romania), 14th SGEM  
875 GeoConference on Water Resources. Forest, Marine and Ocean Ecosystems, Section  
876 Hydrology and Water Resources. Forest, Marine And Ocean Ecosystems,  
877 [www.sgem.org](http://www.sgem.org), SGEM2014 Conference Proceedings, June 19-25, 2014, 1, 303-314,  
878 2014b.
- 879 Touchart, L., Azaroua, A., Millot, C., Bartout, P., and Turcezi, V.: Les risques d'érosion sur les  
880 rives des étangs. Le cas du démaigrissement des plages, *Riscuri si catastrofe*, 11(2),  
881 21-36, 2012.
- 882 Vasileski, D., and Radevski, I.: Analysis of high waters on the Kriva Reka River, Macodonia,  
883 *Acta Geogr. Slov.*, 54(2), 363-377, 2014.
- 884 Verdu, J.M., Batalla, R.J., and Martinez-Casasnovas, J.A.: Assessing river dynamics from 2D  
885 hydraulic modelling and high resolution grain-size distribution, *Z. Geomorphol. N.F.*,  
886 58(1), 95-115, 2014.
- 887 Waylen, P., and Laporte, M.S.: Flooding and the El Nino-Southern Oscillation phenomenon  
888 along the Pacific coast of Costa Rica, *Hydrol. Process.*, 13(16), 2623-2638, 1999.
- 889 Whitfield, P.H.: Floods in future climates: a review, *Journal of Flood Risk Management*, 5(4),  
890 336-365, 2012.
- 891 Wijkman, A., and Timberlake, L.: *Natural Disasters: Acts of God or Acts of Man?* London,  
892 Earthscan, 2010.
- 893 Wu, S.J., Yang, J.C., and Tung, Y.K.: Risk analysis for flood-control structure under  
894 consideration of uncertainties in design flood, *Nat. Hazards*, 58(1), 117-140, 2011.
- 895
